**Title:**

**Tight nanoscale clustering of Fc $\gamma$ -receptors using DNA origami promotes phagocytosis**

Nadja Kern<sup>1,2</sup>, Rui Dong<sup>1,2</sup>, Shawn M. Douglas<sup>1</sup>, Ronald D. Vale<sup>1,2,3\*</sup> and Meghan A. Morrissey<sup>1,4,5\*</sup>

<sup>1</sup> Department of Cellular and Molecular Pharmacology, University of California San Francisco, San Francisco, CA 94158

<sup>2</sup> Howard Hughes Medical Institute, University of California San Francisco, San Francisco, CA 94158

<sup>3</sup> Howard Hughes Medical Institute Janelia Research Campus, Ashburn, VA 20147

<sup>4</sup> Department of Molecular, Cellular and Developmental Biology, University of California Santa Barbara, CA 93106

\*Corresponding Author

<sup>5</sup>Lead contact

1 **Abstract**

2  
3 Macrophages destroy pathogens and diseased cells through Fc $\gamma$  receptor (Fc $\gamma$ R)-driven  
4 phagocytosis of antibody-opsonized targets. Phagocytosis requires activation of multiple  
5 Fc $\gamma$ Rs, but the mechanism controlling the threshold for response is unclear. We  
6 developed a DNA origami-based engulfment system that allows precise nanoscale  
7 control of the number and spacing of ligands. When the number of ligands remains  
8 constant, reducing ligand spacing from 17.5 nm to 7 nm potently enhances engulfment,  
9 primarily by increasing efficiency of the engulfment-initiation process. Tighter ligand  
10 clustering increases receptor phosphorylation, as well as proximal downstream signals.  
11 Increasing the number of signaling domains recruited to a single ligand-receptor  
12 complex was not sufficient to recapitulate this effect, indicating that clustering of multiple  
13 receptors is required. Our results suggest that macrophages use information about local  
14 ligand densities to make critical engulfment decisions, which has implications for the  
15 mechanism of antibody-mediated phagocytosis and the design of immunotherapies.

## 16 **Introduction**

17

18 Immune cells eliminate pathogens and diseased cells while limiting damage to healthy  
19 cells. Macrophages, professional phagocytes and key effectors of the innate immune  
20 system, play an important role in this process by engulfing opsonized targets bearing  
21 'eat me' signals. One of the most common 'eat me' signals is the immunoglobulin G  
22 (IgG) antibody, which can bind foreign proteins on infected cells or pathogens. IgG is  
23 recognized by Fc $\gamma$  receptors (Fc $\gamma$ R) in macrophages that drive antibody-dependent  
24 cellular phagocytosis (ADCP) (Dilillo, Tan, Palese, & Ravetch, 2014; Erwig & Gow,  
25 2016; Nimmerjahn & Ravetch, 2008). ADCP is a key mechanism of action for several  
26 cancer immunotherapies including rituximab, trastuzumab, and cetuximab (Chao et al.,  
27 2010; Uchida et al., 2004; Watanabe et al., 1999; Weiskopf et al., 2013; Weiskopf &  
28 Weissman, 2015). Exploring the design parameters of effective antibodies could provide  
29 valuable insight into the molecular mechanisms driving ADCP.

30

31 Activation of multiple Fc $\gamma$ Rs is required for a macrophage to engulf a three-dimensional  
32 target. Fc $\gamma$ R-IgG must be present across the entire target to drive progressive closure of  
33 the phagocytic cup that surrounds the target (Griffin, Griffin, Leider, & Silverstein, 1975).  
34 In addition, a critical antibody threshold across an entire target dictates an all-or-none  
35 engulfment response by the macrophage (Y. Zhang, Hoppe, & Swanson, 2010).  
36 Although the mechanism of this thresholded response remains unclear, receptor  
37 clustering plays a role in regulating digital responses in other immune cells (Berger et  
38 al., 2020; Davis & van der Merwe, 2006; Holowka & Baird, 1996; Kato et al., 2020; Ma,  
39 Lim, Benda, Goyette, & Gaus, 2020; Veneziano et al., 2020). Fc $\gamma$ R clustering may also  
40 regulate phagocytosis (Goodridge, Underhill, & Touret, 2012). High resolution imaging  
41 of macrophages has demonstrated that IgG-bound Fc $\gamma$ Rs form clusters (resolution of  
42 >100 nm) within the plasma membrane (Lin et al., 2016; Lopes et al., 2017; Sobota et  
43 al., 2005). These small clusters, which recruit downstream effector proteins such as  
44 Syk-kinase and phosphoinositide 3-kinase, eventually coalesce into larger micron-scale  
45 patches as they migrate towards the center of the cell-target synapse (Jaumouillé et al.,  
46 2014; Lin et al., 2016; Lopes et al., 2017; Sobota et al., 2005).

47

48 Prior observational studies could not decouple ligand clustering from other parameters,  
49 such as ligand number or receptor mobility. As a result, we do not have a clear picture  
50 of how ligand number or molecular spacing regulate signal activation. To directly assess  
51 such questions, we have developed a reconstituted system that utilizes DNA origami to  
52 manipulate ligand patterns on a single-molecule level with nanometer resolution. We  
53 found that tightly spaced ligands strongly enhanced phagocytosis compared to the  
54 same number of more dispersed ligands. Through manipulating the number and  
55 spacing of ligands on individual origami pegboards, we found that 8 or more ligands per  
56 cluster maximized Fc $\gamma$ R-driven engulfment, and that macrophages preferentially  
57 engulfed targets that had receptor-ligand clusters spaced  $\leq 7$  nm apart. We  
58 demonstrated that tight ligand clustering enhanced receptor phosphorylation, and the  
59 generation of PIP<sub>3</sub> and actin filaments—critical downstream signaling molecules—at the  
60 phagocytic synapse. Together, our results suggest that the nanoscale clustering of  
61 receptors may allow macrophages to discriminate between lower density background  
62 stimuli and the higher density of ligands on opsonized targets. These results have  
63 implications for the design of immunotherapies that involve manipulating Fc $\gamma$ R-driven  
64 engulfment.

65

## 66 **Results**

67

### 68 **Developing a DNA-based chimeric antigen receptor to study phagocytosis**

69

70 To study how isolated biochemical and biophysical ligand parameters affect engulfment,  
71 we sought to develop a well-defined and tunable engulfment system. Our lab previously  
72 developed a synthetic T cell signaling system, in which we replaced the receptor-ligand  
73 interaction (TCR-pMHC) with complimentary DNA oligos (Taylor, Husain, Gartner,  
74 Mayor, & Vale, 2017). We applied a similar DNA-based synthetic chimeric antigen  
75 receptor to study engulfment signaling in macrophages. In our DNA-CAR $\gamma$  receptor, we  
76 replaced the native extracellular ligand binding domain of the Fc $\gamma$  receptor with an  
77 extracellular SNAP-tag that covalently binds a benzyl-guanine-labeled single-stranded

78 DNA (ssDNA) [receptor DNA; Figure 1a; (Morrissey et al., 2018)]. The SNAP-tag was  
79 then joined to the CD86 transmembrane domain followed by the intracellular signaling  
80 domain of the FcR  $\gamma$  chain (Nimmerjahn & Ravetch, 2008). We expressed the DNA-  
81 CAR $\gamma$  in the macrophage-like cell line RAW264.7 and the monocyte-like cell line THP-1.

82

83 As an engulfment target, we used silica beads coated with a supported lipid bilayer to  
84 mimic the surface of a target cell. The beads were functionalized with biotinylated  
85 ssDNA (ligand DNA) containing a sequence complementary to the receptor DNA via  
86 biotin-neutravidin interactions (Figure 1a). We used a ligand DNA strand that has 13  
87 complementary base pairs to the receptor DNA, which we chose because the receptor-  
88 ligand dwell time (~24 sec (Taylor et al., 2017)) was comparable to the dwell time of  
89 IgG-Fc $\gamma$ R interactions (~30-150 sec (Li et al., 2007)).

90

91 To test whether this synthetic system can drive specific engulfment of ligand-  
92 functionalized silica beads, we used confocal microscopy to measure the number of  
93 beads that were engulfed by each cell (Figure 1b, c). The DNA-CAR $\gamma$  drove specific  
94 engulfment of DNA-bound beads in both RAW264.7 and THP-1 cells (Figure 1c, S1).  
95 The extent of engulfment was similar to IgG-coated beads, and the ligand density  
96 required for robust phagocytosis was also comparable to IgG [Figure 1d, S1; (Bakalar et  
97 al., 2018; Morrissey, Kern, & Vale, 2020)]. As a control, we tested a variant of the DNA-  
98 CAR that lacked the intracellular domain of the FcR  $\gamma$  chain (DNA-CAR<sub>adhesion</sub>). Cells  
99 expressing the DNA-CAR<sub>adhesion</sub> failed to induce engulfment of DNA-functionalized  
100 beads (Figure 1c), demonstrating that this process depends upon the signaling domain  
101 of the Fc $\gamma$  receptor. Together, these data show that the DNA-CAR $\gamma$  can drive  
102 engulfment of targets in a ligand- and Fc $\gamma$ R-specific manner.

103

#### 104 **DNA origami pegboards activate DNA-CAR $\gamma$ macrophages**

105

106 DNA origami technology provides the ability to easily build three-dimensional objects  
107 that present ssDNA oligonucleotides with defined nanometer-level spatial organization  
108 (Hong, Zhang, Liu, & Yan, 2017; Rothmund, 2006; Seeman, 2010; Shaw et al., 2019;

109 Veneziano et al., 2020). We used DNA origami to manipulate the spatial distribution of  
110 DNA-CAR $\gamma$  ligands in order to determine how nanoscale ligand spacing affects  
111 engulfment. We used a recently developed two-tiered DNA origami pegboard that  
112 encompasses a total of 72 ssDNA positions spaced 7 nm and 3.5 nm apart in the x and  
113 y dimensions, respectively (Dong et al., 2021)(Figure 2a, S2). Each of the 72 ligand  
114 positions can be manipulated independently, allowing for full control over the ligand at  
115 each position (Figure S2). The DNA origami pegboard also contains fluorophores at  
116 each of its four corners to allow for visualization, and 12 biotin-modified oligos on the  
117 bottom half of the pegboard to attach it to a neutravidin-containing supported lipid  
118 bilayer or glass coverslip (Figure 2a, b, S2).

119  
120 To determine if the DNA origami pegboards could successfully activate signaling, we  
121 first tested whether receptors were recruited to the origami pegboard in a ligand-  
122 dependent manner. Using TIRF microscopy, we quantified the fluorescence intensity of  
123 the recruited GFP-tagged DNA-CAR $\gamma$  receptor to origami pegboards presenting 0, 2, 4,  
124 16, 36 or 72 ligands (Figure 2b-e). Using signal from the 72 ligand (72L) origami  
125 pegboard as an internal intensity standard of brightness, and thus correcting for  
126 differences in illumination between wells, we found that the average fluorescence  
127 intensity correlated with the number of ligands presented by individual origami  
128 pegboards (Figure 2d, e). In addition, we measured Syk recruitment to individual DNA  
129 origami pegboards and found that Syk intensity also increased as a function of the  
130 number of ligands present on each origami pegboard (Figure 2c, S3). These results  
131 confirmed that our DNA origami system provides a platform that allows quantitative  
132 receptor recruitment and the analysis of downstream signaling pathways.

133

### 134 **Nanoscale clustering of ligand enhances phagocytosis**

135

136 Fc $\gamma$  receptors cluster upon ligand binding, but the functional importance of such  
137 clustering for phagocytosis has not been directly addressed, and whether a critical  
138 density of receptor-ligand pairs is necessary to initiate Fc $\gamma$ R signaling is unclear  
139 (Duchemin, Ernst, & Anderson, 1994; Jaumouillé et al., 2014; Lin et al., 2016; Lopes et

140 al., 2017; Sobota et al., 2005). To address these questions, we varied the size of ligand  
141 clusters by designing DNA origami pegboards presenting 2-36 ligands. To ensure a  
142 constant total number of ligands and origami pegboards on each bead, we mixed the  
143 signaling origami pegboards with 0-ligand “blank” origami pegboards in appropriate  
144 ratios (Figure 3a). We confirmed that the surface concentration of origami pegboards on  
145 the beads was comparable using fluorescence microscopy (Figure S4). We found that  
146 increasing the number of ligands per cluster increased engulfment, but that engulfment  
147 plateaued at a cluster size of 8 ligands (Figure 3b). We confirmed that the observed  
148 engulfment phenotype was both ligand, receptor, and Fc $\gamma$ R signaling dependent (Figure  
149 3c, d). Together, these data reveal that Fc $\gamma$  receptor clustering strongly enhances  
150 engulfment, up to a cluster size of 8 ligands.

151

### 152 **Spatial organization of ligands in nanoclusters regulates engulfment**

153

154 Next, we examined whether distance between individual receptor-ligand molecules  
155 within a signaling cluster impacts engulfment. For this experiment, we varied the  
156 spacing of 4 ligands on the origami pegboard. The 4-ligand tight origami (4T) contains 4  
157 ligands clustered at the center of the pegboard (7 nm by 3.5 nm square), the medium  
158 origami (4M) has ligands spaced 21 nm by 17.5 nm apart, and the spread origami (4S)  
159 has 4 ligands positioned at the four corners of the pegboard (35 nm by 38.5 nm square)  
160 (Figure 4a). We found that the efficiency of macrophage engulfment was approximately  
161 2-fold higher for the 4T functionalized beads when compared to the 4M or 4S beads  
162 (Figure 4a). We confirmed via fluorescence microscopy that the concentration of  
163 origami pegboards on the surface was similar, and therefore ligand numbers on the  
164 beads were similar (Figure S5). DNA CAR constructs that have the FcR  $\gamma$  and  $\zeta$  chain  
165 transmembrane domains in place of the CD86 transmembrane domain and human  
166 THP-1 cells expressing the DNA-CAR $\gamma$  showed the same ligand spacing dependence  
167 (Figure S5). Expression of the various DNA CARs at the cell cortex was comparable,  
168 and engulfment of beads functionalized with both the 4T and the 4S origami platforms  
169 was dependent on the Fc $\gamma$ R signaling domain (Figure S5). Together, these results  
170 demonstrate that macrophages preferentially engulf targets with tighter ligand clusters.



171  
172 Tightly spaced ligands could potentially increase phagocytosis by enhancing the avidity  
173 of receptor-ligand interactions within each cluster. Such a hypothesis would predict that  
174 tightly spaced ligands increase DNA-CAR $\gamma$ -BFP occupancy at the phagocytic cup.  
175 However, when we measured the total fluorescence intensity of receptors at the  
176 phagocytic cup, we did not detect a difference in DNA-CAR $\gamma$ -BFP recruitment to 4T and  
177 4S beads (Figure 6a, b). However, to eliminate any potential contribution of avidity, we  
178 created 4T and 4S origami pegboards with very high-affinity 16mer DNA ligands that  
179 are predicted to dissociate on a time scale of >7 hr (Taylor et al., 2017) (Figure 4b).  
180 Using these 16mer high-affinity ligands, we found that 4T origami beads were still  
181 preferentially engulfed over 4M or 4S origami beads (Figure 4b, S5). These results  
182 suggest that an avidity effect is not the cause of the preferential engulfment of targets  
183 having tightly spaced ligands.

184

### 185 **Tight ligand spacing enhances engulfment initiation and downstream signaling**

186

187 We next determined how ligand spacing affects the kinetics of engulfment. Using data  
188 from live-cell imaging, we subdivided the engulfment process into three steps: bead  
189 binding, engulfment initiation, and engulfment completion (Figure 5a, Supplemental  
190 movie 1). To compare engulfment dynamics mediated by 4T and 4S origami pegboards  
191 in the same experiment, we labeled each pegboard type with a different colored  
192 fluorophore, functionalized a set of beads with each type of pegboard, and added both  
193 bead types to macrophages at the same time (Figure 5b, Supplemental movie 2).  
194 Macrophages interacted with beads functionalized with the 4T and 4S pegboards with  
195 comparable frequency ( $46 \pm 7\%$  total bead-cell contacts vs.  $54 \pm 7\%$  total bead-cell  
196 contacts respectively). However, the probability of engulfment initiation was significantly  
197 higher for the 4T ( $95 \pm 5\%$  of bead contacts) versus 4S ( $61 \pm 9\%$  of bead contacts)  
198 beads, and the probability that initiation events resulted in successful completion of  
199 engulfment was higher for 4T ( $69 \pm 9\%$  of initiation events) versus 4S ( $39 \pm 11\%$  of  
200 initiation events) beads (Figure 5a). Initiation events that failed to induce successful  
201 engulfment either stalled after progressing partially over the bead or retracted the



202 extended membrane back to the base of the bead. In addition, for beads that were  
203 engulfed, the time from contact to engulfment initiation was ~300 sec longer for beads  
204 functionalized with 4S origami pegboards than beads containing 4T origami pegboards  
205 (Figure 5c). However, once initiated, the time from initiation to completion of engulfment  
206 did not differ significantly for beads coated with 4T or 4S origami (Figure 5d). Overall,  $66$   
207  $\pm 8\%$  of 4T bead contacts resulted in successful engulfment compared to  $24\% \pm 8\%$  for  
208 4S beads (Figure 5e). The DNA-CAR<sub>adhesion</sub> macrophages rarely met the initiation  
209 criteria, suggesting that active signaling from the Fc $\gamma$ R is required (Figure S6).  
210 Together, these data reveal that tighter spacing between ligands within a cluster  
211 enhances the probability and kinetics of initiating engulfment, as well as the overall  
212 success frequency of completing engulfment, but does not affect the rate of phagosome  
213 closure once initiated.

214

### 215 **Tightly spaced ligands enhance receptor phosphorylation**

216

217 We next determined how the 4T or 4S origami pegboards affect signaling downstream  
218 of Fc $\gamma$ R binding by measuring fold enrichment at the phagocytic cup compared to the  
219 rest of the cortex of 1) a marker for receptor phosphorylation (the tandem SH2 domains  
220 of Syk, (Bakalar et al., 2018; Morrissey et al., 2018)), 2) PIP<sub>3</sub> (via recruitment of the PIP<sub>3</sub>  
221 binding protein Akt-PH-GFP), and 3) filamentous actin (measured by rhodamine-  
222 Phalloidin binding, Figure 6a, b). We found that 4T phagocytic cups recruited more  
223 tSH2-Syk than the 4S beads, indicating an increase in receptor phosphorylation by  
224 nano-clustered ligands. Generation of PIP<sub>3</sub> and actin filaments at the phagocytic cup  
225 also increased at 4T relative to 4S synapses (Figure 6b). This differential recruitment of  
226 downstream signaling molecules to 4T versus 4S origami beads was most apparent in  
227 early and mid-stage phagocytic cups; late-stage cups showed only a slightly significant  
228 difference in tSH2-Syk recruitment and no significant differences in generation of PIP<sub>3</sub>  
229 or actin filaments (Figure S7). Together, these data demonstrate that nanoscale ligand  
230 spacing affects early downstream signaling events involved in phagocytic cup formation.

231

232 We next sought to understand why distributing ligands into tight clusters enhanced

233 receptor phosphorylation and engulfment. One possibility is that the clustering of four  
234 complete receptors is needed to drive segregation of the inhibitory phosphatase CD45  
235 and allow sustained phosphorylation of the Fc $\gamma$ R Immune Receptor Tyrosine-based  
236 Activation Motif (ITAM) (Bakalar et al., 2018; Freeman et al., 2016; Goodridge et al.,  
237 2012; Schmid et al., 2016). Alternatively, the 4-ligand cluster may be needed to obtain a  
238 critical intracellular concentration of Fc $\gamma$ R ITAM signaling domains. To test for the latter  
239 possibility, we designed a synthetic receptor (DNA-CAR-4x $\gamma$ ) that contains four repeats  
240 of the intracellular domain of the DNA-CAR $\gamma$  connected by a GGSG linker between  
241 each repeat (Figure 6c). We confirmed that this DNA-CAR-4x $\gamma$  receptor was more  
242 potent in activating engulfment than an equivalent receptor (DNA-CAR-1x $\gamma$ -3x $\Delta$ ITAM) in  
243 which the 3 C-terminal ITAM domains were mutated to phenylalanines (Figure 6c, d).  
244 Keeping the number of intracellular ITAMs constant, we compared the engulfment  
245 efficiency mediated by two different receptors: 1) the DNA-CAR-4x $\gamma$  that interacted with  
246 beads functionalized with 1-ligand origami, and 2) the DNA-CAR-1x $\gamma$ -3x $\Delta$ ITAM that  
247 interacted with beads coated with equivalent amounts of 4T origami (Figure 6c). While  
248 the DNA-CAR-1x $\gamma$ -3x $\Delta$ ITAM-expressing macrophages engulfed 4T origami beads, the  
249 DNA-CAR-4x $\gamma$  macrophages failed to engulf the high-affinity 1-ligand origami beads  
250 (Figure 6d, Figure S7). To ensure that all four ITAM domains on the DNA-CAR-4x $\gamma$  were  
251 signaling competent, we designed two additional DNA CARs which placed the  
252 functional ITAM at the second and fourth position (Figure S7). These receptors were  
253 able to induce phagocytosis of 4T origami beads, indicating that the DNA-CAR-4x $\gamma$   
254 likely contains 4 functional ITAMs. Collectively, these results indicate that the tight  
255 clustering of multiple receptors is necessary for engulfment and increasing the number  
256 of intracellular signaling modules on a single receptor is not sufficient to surpass the  
257 threshold for activation of engulfment.

258

## 259 **Discussion**

260

261 Macrophages integrate information from many Fc $\gamma$ R-antibody interactions to  
262 discriminate between highly opsonized targets and background signal from soluble  
263 antibody or sparsely opsonized targets. How the macrophage integrates signals from

264 multiple Fc $\gamma$ R binding events to make an all-or-none engulfment response is not clear.  
265 Here, we use DNA origami nanostructures to manipulate and assess how the nanoscale  
266 spatial organization of receptor-ligand interactions modulates Fc $\gamma$ R signaling and the  
267 engulfment process. We found that tight ligand clustering increases the probability of  
268 initiating phagocytosis by enhancing Fc $\gamma$ R phosphorylation.

269

270 Phagocytosis requires IgG across the entire target surface to initiate local receptor  
271 activation and to ‘zipper’ close the phagocytic cup (Freeman et al., 2016; Griffin et al.,  
272 1975). Consistent with this zipper model, incomplete opsonization of a target surface, or  
273 micron-scale spaces between IgG patches, decreases engulfment (Freeman et al.,  
274 2016; Griffin et al., 1975). Initially suggested as an alternative to the zipper model, the  
275 trigger model proposed that engulfment occurs once a threshold number of receptors  
276 interact with IgG (Ben M'Barek et al., 2015; Griffin et al., 1975; Swanson & Baer, 1995).  
277 While this model has largely fallen out of favor, more recent studies have found that a  
278 critical IgG threshold is needed to activate the final stages of phagocytosis (Y. Zhang et  
279 al., 2010). Our data suggest that there may also be a nanoscale density-dependent  
280 trigger for receptor phosphorylation and downstream signaling. Taken together, these  
281 results suggest that both tight nanoscale IgG-Fc $\gamma$ R clustering and a uniform distribution  
282 of IgG across the target are needed to direct signaling to ‘zipper’ close the phagocytic  
283 cup. Why might macrophages use this local density dependent trigger to dictate  
284 engulfment responses? Macrophages constantly encounter background “eat me”  
285 signals (Gonzalez-Quintela et al., 2008). This hyper-local density measurement may  
286 buffer macrophages against background stimuli and weakly opsonized targets that are  
287 unlikely to have adjacent bound antibodies, while still robustly detecting and efficiently  
288 engulfing highly-opsonized targets.

289

290 Our findings are consistent with previous results demonstrating that Fc $\gamma$ R crosslinking  
291 correlates with increased ITAM phosphorylation (M. M. Huang et al., 1992; Kwiatkowska  
292 & Sobota, 2001; Lin et al., 2016; Sobota et al., 2005). While our data pinpoints a role for  
293 ligand spacing in regulating receptor phosphorylation, it is possible that later steps in the  
294 phagocytic signaling pathway are also directly affected by ligand spacing. The

295 mechanism by which dense-ligand clustering promotes receptor phosphorylation  
296 remains an open question, although our data rule out a couple of models. Specifically,  
297 we demonstrate that nanoscale ligand clustering does not noticeably affect the amount  
298 of ligand-bound receptor at the phagocytic cup, and that ligand spacing continues to  
299 affect engulfment when avidity effects are diminished through the use of high affinity  
300 receptor-ligands. Collectively, these data reveal that changes in receptor binding or  
301 recruitment caused by increased avidity are unlikely to account for the increased  
302 potency of clustered ligands. Our data also exclude the possibility that receptor  
303 clustering simply increases the local intracellular concentration of Fc $\gamma$ R signaling  
304 domains, as arranging Fc $\gamma$ R ITAMs in tandem did not have the same effect as clustering  
305 multiple receptor-ligand interactions. However, it remains possible that the geometry of  
306 the intracellular signaling domains could be important for activating or localizing  
307 downstream signaling, and that tandem ITAMs on the same polypeptide cannot produce  
308 the same engulfment signals as ITAMs on separate parallel polypeptides.

309

310 One possible model to explain the observed ligand-density dependence of signaling  
311 involves the ordering of lipids around the Fc $\gamma$  receptor. Segregated liquid-ordered and  
312 liquid-disordered membrane domains around immune receptor clusters have been  
313 reported to promote receptor phosphorylation (Bag, Wagenknecht-Wiesner, Lee, Shi, &  
314 Holowka, 2020; Dinic, Riehl, Adler, & Parmryd, 2015; Eggeling et al., 2009; Kabouridis,  
315 2006; Simons & Ikonen, 1997; Sohn, Tolar, Jin, & Pierce, 2006; Stone, Shelby, N $\acute{u}$ ñez,  
316 Wisser, & Veatch, 2017). Fc $\gamma$ R clusters are associated with liquid-ordered domains  
317 (Beekman, van der Linden, van de Winkel, & Leusen, 2008; Katsumata et al., 2001;  
318 Kwiatkowska & Sobota, 2001). Liquid-ordered domains recruit Src family kinases, which  
319 phosphorylate Fc $\gamma$ Rs, while liquid-disordered domains are enriched in the  
320 transmembrane phosphatase CD45, which dephosphorylates Fc $\gamma$ Rs (Bag et al., 2020;  
321 Sohn et al., 2006; Stone et al., 2017). Thus, lipid ordering could provide a mechanism  
322 that leads to receptor activation if denser receptor-ligand clusters are more efficient in  
323 nucleating or associating with ordered lipid domains.

324

325 As an alternative model, a denser cluster of ligated receptors may enhance the steric  
326 exclusion of the bulky transmembrane proteins like the phosphatases CD45 and CD148  
327 (Bakalar et al., 2018; Goodridge et al., 2012; Zhu, Brdicka, Katsumoto, Lin, & Weiss,  
328 2008). CD45 is heavily glycosylated, making the extracellular domain 25-40 nm tall  
329 (Davis & van der Merwe, 2006; McCall, Shotton, & Barclay, 1992; Woollett, Williams, &  
330 Shotton, 1985). Because of its size, CD45 is excluded from close cell-cell contacts,  
331 such as those mediated by IgG-Fc $\gamma$ R, which have a dimension of 11.5 nm (Bakalar et  
332 al., 2018; Burroughs et al., 2011; Carbone et al., 2017; Chung, Koo, & Boxer, 2013; Lu,  
333 Ellsworth, Hamacher, Oak, & Sun, 2011; Schmid et al., 2016). IgG bound to antigens  
334  $\leq 10.5$  nm from the target surface induces CD45 exclusion and engulfment (estimated  
335 total intermembrane distance of  $\leq 22$  nm (Bakalar et al., 2018)). Our DNA origami  
336 structure is estimated to generate similar intermembrane spacing, consisting of  
337 hybridized receptor-ligand DNA ( $\sim 9.4$  nm), the origami pegboard (6 nm) and neutravidin  
338 (4 nm) (Rosano, Arosio, & Bolognesi, 1999)]. A higher receptor-ligand density  
339 constrains membrane shape fluctuations (Krobath, Rózycki, Lipowsky, & Weikl, 2009,  
340 2011; Rózycki, Lipowsky, & Weikl, 2010), and this constraint may increase CD45  
341 exclusion (Schmid et al., 2016). Both the lipid ordering and the steric exclusion models  
342 predict at least a partial exclusion of the CD45 from the zone of the receptor cluster.  
343 However, the dimension of the tight cluster in particular is very small (7 by 3.5 nm) and  
344 measurement of protein concentration at this level is currently not easily achieved, even  
345 with super-resolution techniques. Overall, our results establish the molecular and spatial  
346 parameters necessary for Fc $\gamma$ R activation and demonstrate that the spatial organization  
347 of IgG-Fc $\gamma$ R interactions alone can affect engulfment decisions.

348

349 How does the spacing requirements for Fc $\gamma$ R nanoclusters compare to other signaling  
350 systems? Engineered multivalent Fc oligomers revealed that IgE ligand geometry alters  
351 Fc $\epsilon$  receptor signaling in mast cells (Sil, Lee, Luo, Holowka, & Baird, 2007). DNA  
352 origami nanoparticles and planar nanolithography arrays have previously examined  
353 optimal inter-ligand distance for the T cell receptor, B cell receptor, NK cell receptor  
354 CD16, death receptor Fas, and integrins (Arnold et al., 2004; Berger et al., 2020; Cai et  
355 al., 2018; Deeg et al., 2013; Delcassian et al., 2013; Dong et al., 2021; Veneziano et al.,

356 2020). Some systems, like integrin-mediated cell adhesion, appear to have very  
357 discrete threshold requirements for ligand spacing while others, like T cell activation,  
358 appear to continuously improve with reduced intermolecular spacing (Arnold et al., 2004;  
359 Cai et al., 2018). Our system may be more similar to the continuous improvement  
360 observed in T cell activation, as our most spaced ligands (36.5 nm) are capable of  
361 activating some phagocytosis, albeit not as potently as the 4T. Interestingly, as the  
362 intermembrane distance between T cell and target increases, the requirement for tight  
363 ligand spacing becomes more stringent (Cai et al., 2018). This suggests that IgG bound  
364 to tall antigens may be more dependent on tight nanocluster spacing than short  
365 antigens. Planar arrays have also been used to vary inter-cluster spacing, in addition to  
366 inter-ligand spacing (Cai et al., 2018; Freeman et al., 2016). Examining the optimal  
367 inter-cluster spacing during phagosome closure may be an interesting direction for  
368 future studies.

369

370 Our study on the spatial requirements of Fc $\gamma$ R activation could have implications for the  
371 design of therapeutic antibodies or chimeric antigen receptors. Antibody therapies that  
372 rely on Fc $\gamma$ R engagement are used to treat cancer, autoimmune and neurodegenerative  
373 diseases (Chao et al., 2010; Nimmerjahn & Ravetch, 2005; Uchida et al., 2004;  
374 Watanabe et al., 1999; Weiskopf et al., 2013; Weiskopf & Weissman, 2015).  
375 Multimerizing Fc domains, or targeting multiple antibodies to the same antigen may  
376 increase antibody potency (X. Zhang et al., 2016). Interestingly, Rituximab, a successful  
377 anti-CD20 therapy that potently induces ADCP, has two binding sites on its target  
378 antigen (Zhao et al., 2020). Selecting clustered antigens, or pharmacologically inducing  
379 antigen clustering may also increase antibody potency (Chew et al., 2020). These  
380 results suggest that oligomerization may lead to more effective therapy; however, a  
381 systematic study of the spatial parameters that affect Fc $\gamma$ R activation has not been  
382 undertaken (Bakalar et al., 2018). Our data suggest that antibody engineering strategies  
383 that optimize spacing of multiple antibodies through leucine zippers, cysteine bonds,  
384 DNA hybridization (Delcassian et al., 2013; Seifert et al., 2014; Sil, Lee, Luo, Holowka,  
385 & Baird, 2007) or multimeric scaffolds (Divine et al., 2020; Fallas et al., 2017; X. Huang

386 et al., 2020; Ueda et al., 2020) could lead to stronger Fc $\gamma$ R activation and potentially  
387 more effective therapies.

388

389



## 390 **Figure Legends**

391

### 392 **Figure 1: A DNA-based system for controlling engulfment**

393

394 (A) Schematic shows the endogenous (left box) and DNA-based (middle and right  
395 boxes) engulfment systems. Engulfment via endogenous Fc $\gamma$ Rs (left box) is induced  
396 through anti-biotin IgG bound to 1-oleoyl-2-(12-biotinyl(aminododecanoyl))-sn-glycero-3-  
397 phosphoethanolamine (biotin-PE) lipids incorporated into the bilayer surrounding the  
398 silica bead targets. Engulfment induced via the DNA-based system uses chimeric  
399 antigen receptors (CAR) expressed in the macrophage and biotinylated ligand DNA that  
400 is bound to the lipid bilayer surrounding the silica bead. The DNA-CAR $\gamma$  (middle box)  
401 consists of a ssDNA (receptor DNA) covalently attached to an extracellular SNAP-tag  
402 fused to a CD86 transmembrane domain, the intracellular domain of the FcR  $\gamma$  chain,  
403 and a fluorescent tag. The DNA-CAR<sub>adhesion</sub> (right box) is identical but lacks the  
404 signaling FcR  $\gamma$  chain. (B) Example images depicting the engulfment assay. Silica beads  
405 were coated with a supported lipid bilayer (magenta) and functionalized with neutravidin  
406 and the indicated density of ligand DNA (Figure S1a). The functionalized beads were  
407 added to RAW264.7 macrophages expressing either the DNA-CAR $\gamma$  or the DNA-  
408 CAR<sub>adhesion</sub> (green) and fixed after 45 min. The average number of beads engulfed per  
409 macrophage was assessed by confocal microscopy. Scale bar denotes 5  $\mu$ m here and  
410 in all subsequent figures. Internalized beads are denoted with a white sphere in the  
411 merged images. (C) The number of beads engulfed per cell for DNA-CAR $\gamma$  (blue) or  
412 DNA-CAR<sub>adhesion</sub> (grey) macrophages was normalized to the maximum bead eating  
413 observed in each replicate. Dots and error bars denote the mean  $\pm$  SEM of three  
414 independent replicates ( $n \geq 100$  cells analyzed per experiment). (D) DNA-CAR $\gamma$   
415 expressing macrophages were incubated with bilayer-coated beads (grey)  
416 functionalized with anti-biotin IgG (magenta), neutravidin (black), or neutravidin and  
417 saturating amounts of ssDNA (blue). The average number of beads engulfed per cell  
418 was assessed. Full data representing the fraction of macrophages engulfing specific  
419 numbers of IgG or ssDNA beads is shown in figure S1. Each data point represents the  
420 mean of an independent experiment, denoted by symbol shape, and bars denote the

421 mean  $\pm$  SEM. n.s. denotes  $p > 0.05$ , \* indicates  $p < 0.05$ , \*\* indicates  $p < 0.005$  and \*\*\*\*  
422 indicates  $p < 0.0001$  by a multiple t-test comparison corrected for multiple comparisons  
423 using the Holm-Sidak method (C) or Student's T-test (D).

424

## 425 **Figure 2: DNA origami pegboard induces ligand dependent signaling**

426 (A) Schematic shows the DNA-origami pegboard used in this study (right) and the  
427 components used to create it using a one-pot assembly method (left, figure S2). The top  
428 of the two-tiered DNA origami pegboard has 72 positions spaced 7 nm and 3.5 nm apart  
429 in the x and y dimensions, which can be modified to expose a single-stranded ligand  
430 DNA (red) or no ligand (light blue). A fluorophore is attached at each corner of the  
431 pegboard for visualization (pink). The bottom tier of the pegboard displays 12 biotin  
432 molecules (yellow) used to attach the origami to neutravidin-coated surfaces. Full  
433 representation of the DNA origami pegboard assembly is shown in figure S2. (B)  
434 Schematic portraying the TIRF microscopy setup used to image THP-1 cells interacting  
435 with origami pegboards functionalized to glass coverslips in (C) and (D) (left). On the  
436 right is a zoomed-in side view of an origami pegboard functionalized to a biotin (yellow)  
437 and neutravidin (grey) functionalized glass coverslip and interacting with a single DNA-  
438 CAR $\gamma$  receptor. (C) TIRF microscopy images of THP-1 cells show that the DNA-CAR $\gamma$   
439 (BFP; 5<sup>th</sup> panel; black in linescan), the receptor DNA bound to the DNA-CAR $\gamma$  (Cy5; 4<sup>th</sup>  
440 panel; green in linescan), and Syk (mNeonGreen; 3<sup>rd</sup> panel; cyan in merge and  
441 linescan) are recruited to individual 72-ligand origami pegboards (Atto-647; 2<sup>nd</sup> panel;  
442 magenta in merge and linescan). Each diffraction limited magenta spot represents an  
443 origami pegboard. The top panels show a single cell (outlined in yellow), and the bottom  
444 insets (orange box in top image) show three origami pegboards at higher magnification.  
445 The linescan (right, area denoted with a white arrow in merged inset) shows the  
446 fluorescence intensity of each of these channels. Intensity was normalized so that 1 is  
447 the highest observed intensity and 0 is background for each channel. (D) TIRF  
448 microscopy images show DNA-CAR $\gamma$  expressing THP1s interacting with 72-ligand  
449 origami pegboards (pink) and origami pegboards presenting the indicated number of  
450 ligands (pegboards labeled in green). Left schematics represent origami pegboard  
451 setups for each row of images where red dots denote the presence of a ligand DNA.  
452 Middle images depict a single macrophage (outlined in yellow), and right images show

453 the area indicated with an orange box on the left. Examples of DNA-CAR $\gamma$ -  
454 mNeonGreen (grey) recruitment to individual origami pegboards is marked by pink (72L  
455 origami pegboard) and green (origami pegboard with the indicated ligand number)  
456 arrowheads (right). (E) Quantification of experiment shown in (D). Top graph shows the  
457 DNA-CAR $\gamma$  intensity at the indicated origami pegboard type normalized to the average  
458 DNA-CAR $\gamma$  intensity at 72L origami pegboards in the same well. Each dot represents  
459 one origami pegboard and red lines denote the mean  $\pm$  SEM of pooled data from three  
460 separate replicates. n.s. denotes  $p > 0.05$ , \* indicates  $p < 0.05$ , and \*\*\*\* indicates  
461  $p < 0.0001$  by an ordinary one-way ANOVA with Holm-Sidak's multiple comparison test.  
462 A linear regression fit (bottom) of the average fluorescence intensities of each of the  
463 origami pegboards suggests that the mean DNA-CAR $\gamma$  fluorescent intensities are  
464 linearly proportional to the number of ligands per DNA origami pegboard. The black dots  
465 represent the mean normalized DNA-CAR $\gamma$  intensity, the red line denotes the linear  
466 regression fit, and the grey lines show the 95% confidence intervals.

467

### 468 **Figure 3: Nanoscale clustering of ligand enhances phagocytosis**

469 (A) Schematic showing an origami pegboard functionalized to a lipid bilayer  
470 surrounding a silica bead (left) and the origami pegboard mixtures used to functionalize  
471 the bilayer-coated silica beads for experiment quantified in (B) (right). Blue squares  
472 represent origami pegboards with the indicated number of ligands (schematics below,  
473 red dot denotes ligand DNA and light blue dot denotes no ligand) and grey squares  
474 represent 0-ligand "blank" origami pegboards. Pie charts above describe the ratios of  
475 ligand origami presenting pegboards to "blank" pegboards. (B) Beads were  
476 functionalized with mixtures of origami pegboards containing the indicated ligand-  
477 presenting origami pegboard and the 0-ligand "blank" origami pegboards in amounts  
478 designated in (A). The graph depicts the number of beads internalized per DNA-CAR $\gamma$   
479 expressing macrophage normalized to the maximum bead eating in that replicate. Each  
480 dot represents an independent replicate ( $n \geq 100$  cells analyzed per experiment),  
481 denoted by symbol shape, with red lines denoting mean  $\pm$  SEM. Data is normalized to  
482 the maximum bead eating in each replicate. (C) Example image showing the DNA-  
483 CAR $\gamma$  (green) drives engulfment of beads (bilayer labeled in magenta) functionalized

484 with 4-ligand DNA origami pegboards. A cross section of the z plane indicated in the  
485 inset panel (white line, bottom), shows that beads are fully internalized. (D) Bilayer  
486 coated silica beads were functionalized with neutravidin, neutravidin and DNA origami  
487 pegboards presenting 0 DNA ligands, or neutravidin and 4-ligand DNA origami  
488 pegboards. The graph depicts normalized bead eating per cell of the indicated bead  
489 type for cells expressing the DNA-CAR $\gamma$  or the DNA-CAR<sub>adhesion</sub>. Each dot represents  
490 an independent replicate, denoted by symbol shape ( $n \geq 100$  cells analyzed per  
491 experiment), with red lines denoting mean  $\pm$  SEM. The data are normalized to the  
492 maximum bead eating in each replicate. \* denotes  $p < 0.05$ , \*\* denotes  $p < 0.005$ , \*\*\*\*  
493 denotes  $p < 0.0001$ , and n.s. denotes  $p > 0.05$  in (B) and (D) as determined by an  
494 Ordinary one-way ANOVA with Holm-Sidak's multiple comparison test.

495

496 **Figure 4: Spatial arrangement of ligands within nanoclusters regulates**  
497 **engulfment**

498 (A) Schematics (top) depict 4-ligand origami pegboards presenting ligands at the  
499 positions indicated in red. Beads were functionalized with 0-ligand 'blank' (grey) origami  
500 pegboards, 4T (orange) origami pegboards, 4M (green) origami pegboards, or 4S  
501 (cyan) origami pegboards at equal amounts and fed to DNA-CAR $\gamma$  expressing  
502 macrophages. Representative confocal images (middle) depict bead (bilayer in  
503 magenta) engulfment by macrophages (green). Internalized beads are denoted with a  
504 white sphere. Quantification of the engulfment assay is shown in the graph below  
505 depicting the number of beads engulfed per macrophage normalized to the maximum  
506 observed eating in that replicate. (B) Schematics of the receptor DNA (blue) paired with  
507 the medium affinity 13 base paired DNA-ligand (red) used in all previous experiments  
508 including (A) and the high affinity 16 base pair ligand-DNA (yellow) used for experiment  
509 shown in graph below. Beads were functionalized with 0-ligand 'blank' (grey), high  
510 affinity 4T (orange), high affinity 4M (green), or high affinity 4S (cyan) origami  
511 pegboards and fed to DNA-CAR $\gamma$  expressing macrophages. Graph shows the number  
512 of beads engulfed per macrophage normalized to the maximum observed eating in that  
513 replicate. Each data point represents the mean of an independent experiment, shapes  
514 denote data from the same replicate, and bars show the mean  $\pm$  SEM (A, B). \* denotes

515  $p < 0.05$ , \*\*\* denotes  $p < 0.0005$ , \*\*\*\* denotes  $p < 0.0001$ , and n.s. denotes  $p > 0.05$  as  
516 determined by an Ordinary one-way ANOVA with Holm-Sidak's multiple comparison test  
517 (A, B).

518

### 519 **Figure 5: Nanoscale ligand clustering controls engulfment initiation**

520 (A) Schematic portraying origami pegboards used to analyze the steps in the  
521 engulfment process quantified in (C), (D), and (E). Bead binding is defined as the first  
522 frame the macrophage contacts a bead; initiation is the first frame in which the  
523 macrophage membrane has begun to extend around the bead, and completion is  
524 defined as full internalization. The macrophage membrane was visualized using the  
525 DNA CAR $\gamma$ , which was present throughout the cell cortex. The % of beads that progress  
526 to the next stage of engulfment (% success) is indicated for 4T (orange, origami labeled  
527 with Atto550N) and 4S (cyan, origami labeled with Atto647N) beads. \*\*\*\* denotes  
528  $p < 0.0001$  as determined by Fischer's exact test. (B) Still images from a confocal  
529 microscopy timelapse showing the macrophage (green) interacting with both the 4T  
530 origami pegboard functionalized beads (orange) and the 4S origami pegboard  
531 functionalized beads (cyan), but preferentially engulfing the 4T origami pegboard  
532 functionalized beads. In the bottom panel (DNA-CAR $\gamma$  channel), engulfed beads have  
533 been indicated by a sphere colored to match its corresponding origami type. (C) Graph  
534 depicts quantification of the time from bead contact to engulfment initiation for all beads  
535 that were successfully engulfed. Each dot represents one bead with red lines denoting  
536 mean  $\pm$  SEM. (D) Graph depicts the time from engulfment initiation to completion. Each  
537 dot represents one bead with red lines denoting mean  $\pm$  SEM. (E) Graph shows the  
538 fraction of contacted 4T and 4S beads engulfed (orange and cyan, respectively) by the  
539 macrophages. Data represent quantification from 4 independent experiments, denoted  
540 by symbol shape, and bars denote the mean  $\pm$  SEM. n.s. denotes  $p > 0.05$  and \*\*  
541 indicates  $p < 0.005$  by Student's T-test comparing the 4T and 4S functionalized beads  
542 (C-E).

543

### 544 **Figure 6: Nanoscale ligand spacing controls receptor activation**

545 (A) Beads were functionalized with 4T (orange) or 4S (cyan) origami pegboards at equal  
546 amounts, added to macrophages expressing the DNA-CAR $\gamma$  (magenta) and the  
547 indicated signaling reporter protein (green; greyscale on top). Phagocytic synapses  
548 were imaged via confocal microscopy. Asterisks indicate whether a 4T (orange) or a 4S  
549 (cyan) bead is at the indicated phagocytic synapse in the upper panel. (B) Schematic  
550 (left) depicts the areas measured from images shown in (A) to quantify the fluorescence  
551 intensity (yellow outlines). Each phagocytic synapse measurement was normalized to  
552 the fluorescence intensity of the cell cortex at the same z-plane. Graphs (right) depict  
553 the ratio of fluorescence at 4T or 4S functionalized bead synapses to the cortex for the  
554 indicated reporter. Each dot represents one bead with red lines denoting mean  $\pm$  SEM.  
555 (C) Schematic portraying the CAR constructs and origami used in the experiment  
556 quantified in (D). The DNA-CAR-4x $\gamma$  construct (left) consists of four repeats of the  
557 intracellular domain of the DNA-CAR $\gamma$  connected by a GGSG linker. The DNA-CAR-  
558 1x $\gamma$ -3x $\Delta$ ITAM (right) is identical to the DNA-CAR-4x $\gamma$  except that the tyrosines  
559 composing the ITAM domains (purple circles) are mutated to phenylalanines in the  
560 three C-terminal repeats (grey). Cells expressing either of these constructs were fed  
561 beads functionalized with either high affinity 1-ligand origami pegboards (left), high  
562 affinity 4T origami pegboards (right), or 0 ligand “blank” origami pegboards (not shown),  
563 and engulfment was assessed after 45 min. (D) Graph shows the number of beads  
564 engulfed per macrophage normalized to the maximum observed eating in that replicate.  
565 Each data point represents the mean from an independent experiment, denoted by  
566 symbol shape, and bars denote the mean  $\pm$  SEM. Blue points represent a condition  
567 where 16 ITAMs are available per origami, orange points represent conditions where 4  
568 ITAMs are available per origami, purple points represent a condition where 1 ITAM is  
569 available per origami, and grey points represent conditions where no ITAM is available.  
570 n.s. denotes  $p > 0.05$ , \*\*\* denotes  $p < 0.0005$ , and \*\*\*\* denotes  $p < 0.00005$  as determined  
571 by the Student’s T-test (B) or an Ordinary one-way ANOVA with Holm-Sidak’s multiple  
572 comparison test (D).

573

574



## 575 **Supplemental Figure Legends**

576

### 577 **Figure S1, related to Figure 1: DNA-based engulfment system reflects** 578 **endogenous engulfment**

579 (A) Graph depicts the calibration used to determine the surface density of ssDNA on  
580 beads used in Figure 1b, c. The intensity of Alexa Fluor 647 fluorescent bead standards  
581 (black dots) was measured, and a simple linear regression (red line) was fit to the data.  
582 The fluorescence intensity of Alexa Fluor 647-ssDNA coated beads (blue dots) was  
583 measured, and the surface density was interpolated using the regression determined  
584 from the fluorescent bead standards. The concentration of ssDNA used for each bead  
585 coupling condition is indicated next to the blue points on the graph. (B) Macrophages  
586 expressing the DNA-CAR $\gamma$  (blue) or the DNA-CAR<sub>adhesion</sub> (grey) engulfed similar  
587 distributions of IgG functionalized beads. Data is pooled from two independent  
588 replicates. (C) Graph depicts the fraction of macrophages engulfing the indicated  
589 number of IgG (magenta) or ssDNA (blue) beads from data pooled from the three  
590 independent replicates presented in Figure 1d. (D) Graph shows the average number of  
591 Neutraavidin (black), ligand-DNA (blue), or IgG (magenta) functionalized beads engulfed  
592 by the monocyte-like cell line THP1. Lines denote the mean engulfment from each  
593 independent replicate and bars denote  $\pm$  SEM. P values were calculated using the  
594 Mann-Whitney test (B, C) and n.s. denotes  $p > 0.05$  as determined by the Student's T-  
595 test (D).

596

### 597 **Figure S2, related to Figure 2: Design and Assembly of Nanoscale Ligand-** 598 **Patterning Pegboard built from DNA origami.**

599 (A) 2D schematic of origami scaffold and staples. The p8064 ssDNA scaffold is  
600 combined with 160 ssDNA staples that form the chassis, biotin-modified surface  
601 anchors, and ATTO647N-labeled dyes, plus a combination of 72 ligand-patterning  
602 staples. We used three variants of the ligand-patterning staples: "-ligand" that lacks a 3'  
603 single-stranded overhang and terminates flush with the pegboard surface, and a  
604 "medium-affinity" (red) and "high-affinity" (yellow) that form 13-bp and 16-bp duplexes  
605 with the DNA-CAR receptors, respectively. Assembly is performed by thermal annealing



606 in a one-pot reaction. (B) Cadnano strand diagram for the pegboard with 72 medium-  
607 affinity ligands included. (C) Fourteen pegboard configurations were used in this study.  
608 Configurations are labeled by ligand count, spacing, and ligand affinity, and the  
609 corresponding plate wells used in each assembly are shown.

610

611 **Figure S3, related to Figure 2: Syk intensity increases with ligand number in**  
612 **origami cluster**

613 (A) TIRF microscopy images showing DNA-CAR $\gamma$ -mNeonGreen and Syk-BFP  
614 expressing THP1s interacting with 72-ligand origami pegboards (pink) and origami  
615 pegboards presenting the indicated number of ligands (green) plated together on a  
616 glass surface (schematics shown on the left). Middle images depict a single  
617 macrophage, and right images show the area indicated with a yellow box on the left.  
618 Examples of Syk-BFP (grey) recruitment to individual origami pegboards is marked by  
619 pink (72L origami) and green (indicated ligand number origami) arrowheads (right). (B)  
620 Top graph shows the Syk intensity at each indicated origami pegboard type normalized  
621 to the average Syk intensity at 72L origami pegboards for each condition. Each dot  
622 represents the normalized Syk intensity at one origami and red lines denote the mean  $\pm$   
623 SEM of pooled data from three separate replicates. At ligand numbers fewer than 16,  
624 we did not detect Syk enrichment over background fluorescence of cytosolic Syk. A  
625 linear regression fit (bottom) of the average Syk fluorescence intensity at each origami  
626 pegboard type suggests that the mean Syk recruitment is linearly proportional to the  
627 number of ligands per DNA origami. n.s. denotes  $p > 0.05$  and \*\*\*\* indicates  $p < 0.0001$   
628 by an ordinary one-way ANOVA with Holm-Sidak's multiple comparison test.

629

630 **Figure S4, related to Figure 3: Origami intensity on beads is comparable across**  
631 **conditions**

632

633 (A) Graph shows the average Atto647N fluorescence intensity from the beads used in  
634 Figure 3a, b measured using confocal microscopy. Each dot represents an independent  
635 replicate ( $n \geq 100$  cells analyzed per experiment), denoted by symbol shape, with red

636 lines denoting mean  $\pm$  SEM. n.s. denotes  $p > 0.05$  as determined by an Ordinary one-  
637 way ANOVA with Holm-Sidak's multiple comparison test.

638

639 **Figure S5, related to Figure 4: Ligand clustering enhances engulfment in RAW**  
640 **macrophages expressing DNA CARs with endogenous Fc $\gamma$ R transmembrane**  
641 **domains and in THP1s**

642

643 (A) Graph shows the average Atto647N fluorescence intensity from the beads used in  
644 Figure 4a measured using confocal microscopy. (B) Beads were functionalized with the  
645 indicated ligand-presenting origami pegboards in amounts calculated to equalize the  
646 total number of origami pegboards and ligands across conditions. Schematics (left)  
647 depict the origami utilized, where the positions presenting a ligand (red dots) and the  
648 positions not occupied by a ligand (light blue) are indicated. Graph (right) depicts the  
649 average number of the indicated type of beads internalized per DNA-CAR $\gamma$ -expressing  
650 THP1, normalized to the maximum bead eating in that replicate. (C) Graph shows the  
651 average Atto647N647 fluorescence intensity from the beads used in Figure 4b  
652 measured using confocal microscopy. (D) Schematics below graph depict the DNA CAR  
653 constructs designed with varying transmembrane domains. Beads were functionalized  
654 with 4T origami pegboards (orange), 4S origami pegboards (cyan), or 0-ligand 'blank'  
655 origami pegboards (grey) and fed to macrophages expressing the DNA CAR receptor  
656 depicted below each section of the graph. Graph depicts the number of beads engulfed  
657 per macrophage normalized to the maximum observed eating in that replicate. (E)  
658 Graph shows the average Atto647N fluorescence intensity from the beads used in (D)  
659 measured using confocal microscopy. (F) DNA CAR receptors used in (D) are  
660 expressed and trafficked to the membrane at similar levels. Fluorescent intensity at the  
661 cell cortex of the DNA CAR-infected macrophage was quantified using the mean  
662 intensity of a 2 pixel width linescan at the cell membrane, with the mean intensity of a  
663 linescan immediately adjacent to the cell subtracted for local background. The  
664 fluorescence intensity was normalized to the average intensity of the DNA CAR<sub>adhesion</sub> in  
665 each experiment. Each dot represents an individual cell and data is pooled from 3  
666 independent experiments, with red lines denoting mean  $\pm$  SEM. n.s. denotes  $p > 0.05$ , \*

667 denotes  $p < 0.05$ , \*\* denotes  $p < 0.005$ , \*\*\* denotes  $p < 0.0005$ , and \*\*\*\* indicates  $p < 0.0001$   
668 as determined by an Ordinary one-way ANOVA with Holm-Sidak's multiple comparison  
669 test (A-F).

670

671 **Figure S6, related to Figure 5: DNA CAR<sub>adhesion</sub> fails to induce frequent engulfment**  
672 **initiation attempts**

673

674 (A) The average number of 4T origami pegboard-functionalized beads contacting (grey),  
675 in the initiation stage of engulfment (blue), or fully engulfed (green) by macrophages  
676 expressing either the DNA CAR<sub>adhesion</sub> or the DNA CAR<sub>γ</sub> were quantified from fixed still  
677 images after 45 minutes of engulfment. 125 beads in contact with DNA CAR expressing  
678 macrophages were analyzed in 3 independent replicates. Bars represent the average  
679 number of beads identified at each stage and black lines denote  $\pm$  SEM between  
680 replicates. n.s. denotes  $p > 0.05$  and \* denotes  $p < 0.05$  as determined by an unpaired t-  
681 test with Holm-Sidak's multiple comparison test.

682

683 **Figure S7, related to Figure 6: Differential recruitment of downstream signaling**  
684 **molecules is greater at early and mid-stage phagocytic cups**

685

686 (A) Data from experiment shown in Figure 6b is separated by early (macrophage  
687 membrane extends across  $< 30\%$  of the bead, left), mid (macrophage membrane  
688 extends across  $30-70\%$  of the bead, middle), and late (macrophage membrane extends  
689 across  $> 70\%$  of the bead, right) stage phagocytic cups. Graphs depict the ratio of  
690 fluorescence intensity at 4T or 4S functionalized bead synapses compared to the  
691 cortex. Each dot represents one bead with red lines denoting mean  $\pm$  SEM. n.s. denotes  
692  $p > 0.05$ , \* denotes  $p < 0.05$ , \*\*\* denotes  $p < 0.0005$ , and \*\*\*\* denotes  $p < 0.00005$  by the  
693 Student's T-test. (B) Graph shows the average Atto647N fluorescence intensity from the  
694 beads used in Figure 6d measured using confocal microscopy. (C) Schematics depict  
695 the DNA-CAR-4x $\gamma$  constructs used for experiment quantified in (D). (D) DNA CAR  
696 constructs shown in (C) were expressed in RAW macrophages and fed beads  
697 functionalized with 4T high affinity origami pegboards, 1 ligand high affinity origami

698 pegboards, or 0 ligand origami pegboards. Graph depicts the number of beads engulfed  
699 per macrophage normalized to the maximum observed eating in that replicate. Each  
700 data point represents the mean from an independent experiment, denoted by symbol  
701 shape, and bars denote the mean  $\pm$  SEM. Blue points represent a condition where 16  
702 ITAMs are available per origami, orange points represent conditions where 4 ITAMs are  
703 available per origami, purple points represent a condition where 1 ITAM is available per  
704 origami, and grey points represent conditions where no ITAM is available. (E) Graph  
705 shows the average Atto647N fluorescence intensity from the beads used in (D)  
706 measured using confocal microscopy. (F) DNA CAR receptors used in (D) are  
707 expressed and trafficked to the membrane at similar levels. Fluorescent intensity at the  
708 cell cortex of the DNA CAR infected macrophage was quantified using the mean  
709 intensity of a 2 pixel width linescan at the cell membrane, with the mean intensity of a  
710 linescan immediately adjacent to the cell subtracted for local background. The  
711 fluorescence intensity was normalized to the average intensity of the DNA-CAR-4x $\gamma$  in  
712 each experiment. Each dot represents an individual cell and data is pooled from 3  
713 independent experiments, with red lines denoting mean  $\pm$  SEM. n.s. denotes  $p > 0.05$   
714 and \*\*\*\* indicates  $p < 0.0001$  as determined by an Ordinary one-way ANOVA with Holm-  
715 Sidak's multiple comparison test (B,D-F).

716

717 **Supplemental movie 1: The engulfment program broken into three steps, bead**  
718 **binding, engulfment initiation, and engulfment completion.**

719 A macrophage infected with the DNA-CAR $\gamma$  (green) engulfs a 5  $\mu$ m silica bead coated  
720 in a supported lipid bilayer (magenta) and functionalized with 4T origami pegboards.  
721 The movie is a maximum intensity projection of z-planes and depicts the bead binding,  
722 initiation, and completion steps of the engulfment process. Time is indicated at the top  
723 left and scale bar denotes 5  $\mu$ m.

724

725 **Supplemental movie 2: DNA CAR $\gamma$  macrophages preferentially engulf beads**  
726 **functionalized with tightly spaced ligands.**

727 A DNA-CAR $\gamma$  expressing macrophage (green) interacts with 4T origami pegboard  
728 functionalized beads (orange) and 4S origami pegboard functionalized beads (cyan)

729 that were added simultaneously and in equal amounts to the well of cells. The  
730 macrophage engulfs only 4T origami pegboard functionalized beads. The movie is a  
731 maximum intensity projection of z-planes acquired every 20 secs for 28 min. Time is  
732 indicated at the top left.

## 733 **Methods**

734

### 735 **Cell culture**

736 RAW264.7 macrophages were purchased from the ATCC and cultured in DMEM  
737 (Gibco, Catalog #11965–092) supplemented with 1x Penicillin-Streptomycin-L-  
738 Glutamine (Corning, Catalog #30–009 CI), 1 mM sodium pyruvate (Gibco, Catalog  
739 #11360-070) and 10% heat-inactivated fetal bovine serum (Atlanta Biologicals, Catalog  
740 #S11150H). THP1 cells were also purchased from the ATCC and cultured in RPMI  
741 1640 Medium (Gibco, Catalog #11875-093) supplemented with 1x Pen-Strep-Glutamine  
742 and 10% heat-inactivated fetal bovine serum. All cells were certified mycoplasma-free  
743 and discarded after 20 passages to minimize variation.

744

### 745 **Constructs and antibodies**

746 All relevant information can be found in the key resources table, including detailed  
747 descriptions of the amino acid sequences for all constructs.

748

### 749 **Lentivirus production and infection**

750 Lentiviral infection was used to express constructs described in the key resources table  
751 in either RAW264.7 or THP1 cells. Lentivirus was produced by HEK293T cells or Lenti-  
752 X 293T cells (Takara Biosciences, Catalog #632180) transfected with pMD2.G (a gift  
753 from Didier Trono, Addgene plasmid # 12259 containing the VSV-G envelope protein),  
754 pCMV-dR8.91 (since replaced by second generation compatible pCMV-dR8.2, Addgene  
755 plasmid #8455), and a lentiviral backbone vector containing the construct of interest  
756 (derived from pHRSIN-CSGW, see key resource table) using lipofectamine LTX  
757 (Invitrogen, Catalog # 15338–100). The HEK293T media was harvested 60-72 hr post-  
758 transfection, filtered through a 0.45 µm filter, and concentrated using Lenti-X (Takara  
759 Biosciences, Catalog #631232) via the standard protocol. Concentrated virus was  
760 added directly to the cells and the plate was centrifuged at 2200xg for 45 min at 37°C.  
761 Cells were analyzed a minimum of 60 hr later. Cells infected with more than one viral  
762 construct were FACs sorted (Sony SH800) before use to enrich for double infected  
763 cells.

764

## 765 **DNA origami preparation**

766 The DNA origami pegboard utilized for all experiments was generated as described in  
767 figure S2. The p8064 DNA scaffold was purchased from IDT (Catalog # 1081314). All  
768 unmodified oligonucleotides utilized for the origami were purchased from IDT in 96 well  
769 plates with standard desalting purification and resuspension at 100  $\mu$ M in water.  
770 Fluorophore and biotin conjugated oligonucleotides were also purchased from IDT  
771 (HPLC purification). All oligonucleotide sequences are listed in table 1, the assembly is  
772 schematized in figure S2, and the Cadnano strand diagram for the pegboard with 72  
773 medium-affinity ligands is included in S2. Core staple oligonucleotides (200 nM) (plates  
774 1 and 2), ligand oligonucleotides (200nM) (plates 3-L, 3MA, and 3HA), biotinylated  
775 oligonucleotides (200nM), DNA scaffold (20 nM final concentration), and fluorophore-  
776 labeled oligonucleotides (200 nM final concentration) were mixed in 1x folding buffer (5  
777 mM Tris pH 8.0, 1 mM EDTA, 5 mM NaCl, 20 mM MgCl<sub>2</sub>). Origami folding reaction was  
778 performed in a PCR thermocycler (Bio-Rad MJ Research PTC-240 Tetrad), with initial  
779 denaturation at 65 °C for 15 min followed by cooling from 60°C to 40°C with a decrease  
780 of 1° C per hr. To purify excess oligonucleotides from fully folded DNA origami, the DNA  
781 folding reaction was mixed with an equal volume of PEG precipitation buffer (15% (w/v)  
782 PEG-8000, 5 mM Tris-Base pH 8.0, 1 mM EDTA, 500 mM NaCl, 20 mM MgCl<sub>2</sub>) and  
783 centrifuged at 16,000x rcf for 25 min at room temperature. The supernatant was  
784 removed, and the pellet was resuspended in 1x folding buffer. PEG purification was  
785 repeated a second time and the final pellet was resuspended at the desired  
786 concentration in 1x folding buffer and stored at 4°C.

787

## 788 **Preparation of benzylguanine-conjugated DNA oligonucleotides**

789 5'-amine modified (5AmMC6) DNA oligonucleotides were ordered from IDT and diluted  
790 in 0.15 M HEPES pH 8.5 to a final concentration of 2 mM. N-hydroxysuccinimide ester  
791 (BG-GLA-NHS) functionalized benzylguanine was purchased from NEB (Cat #S9151S)  
792 and freshly reconstituted in DMSO to a final concentration of 83 mM. To functionalize  
793 the oligonucleotides with benzylguanine, the two solutions were mixed so that the molar  
794 ratio of oligonucleotide-amine:benzylguanine-NHS is 1:50, and the final concentration of  
795 HEPES is between 50 mM and 100 mM. The reaction was left on a rotator overnight at



796 room temperature. To remove excess benzyguanine-NHS ester, the reaction product  
797 was purified the next day with illustra NAP-5 Columns (Cytiva, Cat #17085301), using  
798 H<sub>2</sub>O for elution. The molar concentration of the benzyguanine conjugated  
799 oligonucleotides was determined by measuring the absorbance of the purified reaction  
800 at 260 nm with a Nanodrop. This reaction was further condensed with the Savant  
801 SpeedVac DNA 130 Integrated Vacuum Concentrator System, resuspended in water to  
802 a final concentration of 100  $\mu$ M, aliquoted, and stored at -20°C until use.

803

### 804 **Functionalization of glass surface with DNA origami**

805 96-well glass bottom MatriPlates were purchased from Brooks (Catalog # MGB096-1-2-  
806 LG-L). Before use, plates were incubated in 5% (v/v) Hellmanex III solution (Z805939-  
807 1EA; Sigma) overnight, washed extensively with Milli-Q water, dried under the flow of  
808 nitrogen gas, and covered with sealing tape (ThermoFisher, Cat # 15036). Wells used  
809 for experiment were unsealed, incubated with 200  $\mu$ L of Biotin-BSA (ThermoFisher, Cat  
810 # 29130) at 0.5 mg/mL in PBS pH 7.4 at RT for 2 hr-overnight. Wells were washed 6x  
811 with PBS pH 7.4 to remove excess BSA and incubated for 30 min at room temperature  
812 with 100  $\mu$ L neutravidin at 250  $\mu$ g/mL in PBS pH 7.4 for origami quantification and 50  
813  $\mu$ g/mL for cellular experiments. Wells were again washed 6x with PBS pH 7.4  
814 supplemented with 20 mM MgCl<sub>2</sub> and incubated for 1-2 hr with the desired amount of  
815 DNA origami diluted in PBS pH 7.4 with 20 mM MgCl<sub>2</sub> and 0.1% BSA.

816

### 817 **DNA origami quantification**

818 5 wells of a 96-well glass bottom MatriPlate per origami reaction were prepared as  
819 described in 'Functionalization of glass surface with DNA origami'. The purified DNA  
820 origami reaction was serially diluted into PBS pH 7.4 with 20 mM MgCl<sub>2</sub> and 0.1% BSA  
821 and 5 different concentrations were plated and incubated for 1.5 hr before washing 5x  
822 with PBS pH 7.4 with 20 mM MgCl<sub>2</sub> and 0.1% BSA. Fluorescent TIRF images were  
823 acquired in the channel with which the origami was labeled. 100 sites per well were  
824 imaged using the High Content Screening (HCS) Site Generator plugin in uManager  
825 (Stuurman, Edelstein, Amodaj, Hoover, & Vale, 2010). The number of individual DNA  
826 origami per  $\mu$ m<sup>2</sup> in each well were quantified using the Spot Counter plugin in Fiji. This

827 was repeated for all concentrations of origami plated. The final concentration of the  
828 origami reaction was measured as number of origami/ $\mu\text{m}^2$  and was calculated from a  
829 linear fit including all concentrations in which individual origami could be identified by  
830 the plugin.

831

### 832 **TIRF imaging**

833 96-well glass bottom MatriPlates were functionalized with DNA origami as described  
834 and then washed into engulfment imaging media (20 mM Hepes pH 7.4, 135 mM NaCl,  
835 4 mM KCl, 1 mM  $\text{CaCl}_2$ , 10 mM glucose) containing 20 mM  $\text{MgCl}_2$ . ~100,000 dual  
836 infected mNeonGreen-DNA-CAR $\gamma$  and BFP-Syk THP1 cells per well were pelleted via  
837 centrifugation, washed into engulfment imaging media, re-pelleted, and resuspended  
838 into 50  $\mu\text{L}$  of engulfment imaging media. 1  $\mu\text{L}$  of 100  $\mu\text{M}$  benzylguanine-labeled receptor  
839 DNA stock was added per ~50,000 cells pelleted, and the cell-DNA mixture was  
840 incubated at room temperature for 15 min. Cells were subsequently washed twice via  
841 centrifugation with 10 mL of imaging buffer to remove excess benzylguanine labeled  
842 DNA and resuspended in 200  $\mu\text{L}$  per 100,000 cells of imaging buffer containing 20 mM  
843  $\text{MgCl}_2$ . Cells were then immediately added to each well and imaged. Data was only  
844 collected from a central ROI in the TIRF field. The origami fluorescent intensities along  
845 the x and y axis were plotted to ensure there was no drop off in signal and thus no  
846 uniformity of illumination.

847

### 848 **Quantification of receptor and Syk recruitment to individual origami**

849 Cells that expressed both the mNeonGreen tagged DNA-CAR $\gamma$  receptor and the BFP-  
850 tagged Syk and had interactions with the 72-ligand origami were chosen for analysis in  
851 Fiji. An ROI was drawn around the perimeter of the cell-glass surface interaction, which  
852 was determined by the presence of receptor fluorescence. The 'Spot Intensity in All  
853 Channel' plugin in Fiji was used to identify individual origami pegboards, measure  
854 fluorescence intensity of the DNA-CAR $\gamma$  receptor and Syk at each origami pegboard,  
855 and subtract local background fluorescence. The intensity at each origami pegboard  
856 was normalized to the average intensity measured at 72-ligand origami pegboards in  
857 each well.

858

### 859 **Supported lipid bilayer coated silica bead preparation**

860 Chloroform-suspended lipids were mixed in the following molar ratios: 96.8% POPC  
861 (Avanti, Catalog # 850457), 2.5% biotinyl cap PE (Avanti, Catalog # 870273), 0.5%  
862 PEG5000-PE (Avanti, Catalog # 880230, and 0.2% atto390-DOPE (ATTO-TEC GmbH,  
863 Catalog # AD 390–161) for labeled lipid bilayers, or 97% POPC, 2.5% biotinyl cap PE,  
864 and 0.5% PEG5000-PE for unlabeled lipid bilayers. The lipid mixes were dried under  
865 argon gas and desiccated overnight to remove chloroform. The dried lipids were  
866 resuspended in 1 mL PBS, pH 7.2 (Gibco, Catalog # 20012050) and stored under argon  
867 gas. Lipids were formed into small unilamellar vesicles via  $\geq 30$  rounds of freeze-thaws  
868 and cleared via ultracentrifugation (TLA120.1 rotor, 35,000 rpm / 53,227 x g, 35 min,  
869 4°C). Lipids were stored at 4°C under argon gas in an eppendorf tube for up to two  
870 weeks. To form bilayers on beads,  $8.6 \times 10^8$  silica beads with a 4.89  $\mu\text{m}$  diameter (10  $\mu\text{l}$   
871 of 10% solids, Bangs Labs, Catalog # SS05N) were washed 2x with water followed by  
872 2x with PBS by spinning at 300rcf and decanting. Beads were then mixed with 1mM  
873 SUVs in PBS, vortexed for 10 s at medium speed, covered in foil, and incubated in an  
874 end-over-end rotator at room temperature for 0.5-2 hr to allow bilayers to form over the  
875 beads. The beads were then washed 3x in PBS to remove excess SUVs, and  
876 resuspended in 100 $\mu\text{L}$  of 0.2% casein (Sigma, catalog # C5890) in PBS for 15 min at  
877 room temperature to block nonspecific binding. Neutravidin (Thermo, Catalog # 31000)  
878 was added to the beads at a final concentration of 1  $\mu\text{g/ml}$  for 20-30 minutes, and the  
879 beads were subsequently washed 3x in PBS with 0.2% casein and 20mM  $\text{MgCl}_2$  to  
880 remove unbound neutravidin. The indicated amounts of biotinylated ssDNA or  
881 saturating amounts of DNA origami pegboards were added to the beads and incubated  
882 for 1 hr at room temperature with end-over-end mixing to allow for coupling. Beads were  
883 washed 2 times and resuspended in 100 $\mu\text{L}$  PBS with 0.2% casein and 20 mM  $\text{MgCl}_2$  to  
884 remove uncoupled origami pegboards or ssDNA. When functionalizing SUV-coated  
885 beads with anti-biotin AlexaFluor647-IgG (Jackson ImmunoResearch Laboratories  
886 Catalog # 200-602-211, Lot # 137445), the IgG was added to the beads at 1 $\mu\text{M}$   
887 immediately following the casein blocking step, and beads were incubated for 1 hr at  
888 room temperature with end-over-end mixing.

889

### 890 **Quantification of ssDNA, IgG, or origami on beads**

891 To estimate the amount of ssDNA bound to each bead, we compared the fluorescence  
892 of Atto647-labeled DNA on the bead surface to calibrated fluorescent beads (Quantum  
893 AlexaFluor 647, Bangs Lab) using confocal microscopy (Figure S1). To determine  
894 saturating conditions of IgG and origami pegboards, we titrated the amount of IgG or  
895 origami in the coupling reaction and used confocal microscopy to determine the  
896 concentration at which maximum coupling was achieved. A comparable amount of  
897 origami pegboard coupling was also confirmed with confocal microscopy for beads used  
898 in the same experiment.

899

### 900 **Quantification of engulfment**

901 30,000 RAW264.7 macrophages were plated in one well of a 96-well glass bottom  
902 MatriPlate (Brooks, Catalog # MGB096-1-2-LG-L) between 12 and 24 hr prior to the  
903 experiment. Immediately before adding beads, 100  $\mu$ L of a 1  $\mu$ M solution of  
904 benzylguanine-conjugated receptor DNA in engulfment imaging media was added,  
905 incubated for 10 min at room temperature, and washed out 4 times with engulfment  
906 imaging media containing 20 mM  $MgCl_2$ , making sure to leave  $\sim$ 100  $\mu$ L of media  
907 covering the cells between washes, and finally leaving the cells in  $\sim$ 300  $\mu$ L of media.  $\sim$ 8  
908  $\times 10^5$  beads were added to the well and engulfment was allowed to proceed for 45 min  
909 in the cell incubator. Cells were fixed with 4% PFA for 10 min and washed into PBS. For  
910 figures 4c and 6d, 10 nM AlexaFluor647 anti-biotin IgG (Jackson Immuno Labs, Catalog  
911 # 200-602-211) diluted into PBS containing 3% BSA was added to each well for 10  
912 minutes to label non-internalized beads. Wells were subsequently washed 3 times with  
913 PBS. Images were acquired using the High Content Screening (HCS) Site Generator  
914 plugin in  $\mu$ Manager and at least 100 cells were scored for each condition. When  
915 quantifying bead engulfment, cells were selected for analysis based on a threshold of  
916 GFP fluorescence, which was held constant throughout analysis for each individual  
917 experiment. For figures 3, 4, 6, and S5 the analyzer was blinded during engulfment  
918 scoring using the position randomizer plug-in in  $\mu$ Manager. For the THP1 cells,  
919  $\sim$ 100,000 cells per condition were spun down, washed into engulfment imaging media,

920 and coupled to benzylguanine-labeled receptor DNA as described under TIRF imaging.  
921 Cells were resuspended into 300  $\mu$ L engulfment imaging media containing 20 mM  
922  $MgCl_2$  in an Eppendorf tube,  $\sim 8 \times 10^5$  beads were added to the tube, and the tube was  
923 inverted 8x before plating the solution into a round-bottomed 96 well plate (Corning,  
924 Catalog # 38018). Engulfment was allowed to proceed for 45 min in the cell incubator  
925 before the plate was briefly spun and the cells were fixed in 4% PFA for 10 min. Cells  
926 were subsequently washed 3x with PBS by briefly centrifuging the plate and removing  
927 the media, and finally moved into a 96-well glass bottom MatriPlate for imaging.  
928

### 929 **Quantification of engulfment kinetics**

930 RAW264.7 macrophages were plated and prepared in wells of a 96-well glass bottom  
931 MatriPlate as described in 'Quantification of engulfment'. Using Multi-Dimensional  
932 Acquisition in  $\mu$ Manager, 4 positions in the well were marked for imaging at 20 sec  
933 intervals through at least 7 z-planes.  $\sim 4 \times 10^5$  Atto647N-labeled 4S origami  
934 functionalized beads and  $\sim 4 \times 10^5$  Atto550N-labeled 4T origami functionalized beads  
935 were mixed in an Eppendorf tube, added to the well, and immediately imaged. Bead  
936 contacts were identified by counting the number of beads that came into contact with  
937 the cells throughout the imaging time. Initiation events were identified by active  
938 membrane extension events around the bead. Engulfment completion was identified by  
939 complete internalization of the bead by the macrophage. The initiation time was  
940 quantified as the amount of time between bead contact (the first frame in which the  
941 bead contacted the macrophage) and engulfment initiation (the first frame in which  
942 membrane extension around the bead was visualized) and was only measured for  
943 beads that were completely internalized by the end of the imaging time. The engulfment  
944 time was quantified as the amount of time between engulfment initiation and engulfment  
945 completion (the first frame in which the bead has been fully internalized by the cell).

946

### 947 **Quantification of synapse intensity of DNA-CAR $\gamma$ receptor, tSH2 Syk, PIP $_3$ 948 reporter, and actin filaments**

949 Phagocytic cups were selected for analysis based on clear initiation of membrane  
950 extension around the bead visualized by GFP fluorescence from the DNA-CAR $\gamma$

951 receptor. The phagocytic cup and the cell cortex (areas indicated in schematic in figure  
952 6b) were traced with a line (6 pixels wide for DNA-CAR $\gamma$  receptor and the tSH2 Syk  
953 reporter, and 8 pixels wide for the Akt-PH reporter and phalloidin) at the Z-slice with the  
954 clearest cross section of the cup.

955

### 956 **Microscopy and analysis**

957 Images were acquired on a spinning disc confocal microscope (Nikon Ti-Eclipse  
958 inverted microscope with a Yokogawa CSU-X spinning disk unit and an Andor iXon EM-  
959 CCD camera) equipped with a 40  $\times$  0.95 NA air and a 100  $\times$  1.49 NA oil immersion  
960 objective. The microscope was controlled using  $\mu$ Manager. For TIRF imaging, images  
961 were acquired on the same microscope with a motorized TIRF arm using a Hamamatsu  
962 Flash 4.0 camera and the 100x 1.49 NA oil immersion objective.

963

### 964 **Statistics**

965 Statistical analysis was performed in Prism 8 (GraphPad, Inc). The statistical test used  
966 is indicated in each relevant figure legend.

967

### 968 **Acknowledgements**

969

970 We thank N. Stuurman for help with microscopy and developing the ‘image randomizer’  
971 plug-in for blinding our analysis as well as the ‘Spot Intensity in All Channel’ plugin for  
972 quantification of our TIRF experiments. We also thank K. McKinley, T. Skokan, C.  
973 Gladkova, J. Sheu-Gruttadauria for discussions and critical feedback on this  
974 manuscript. M.A.M. was supported by the National Institute of General Medical  
975 Sciences of the National Institutes of Health under award number F32GM120990.  
976 S.M.D. was supported by the Army Research Office (W911NF-14-1-0507) and Office of  
977 Naval Research (N00014-17-1-2627). Funding was provided by the Howard Hughes  
978 Medical Institute to R.D.V.

979

### 980 **Author Contributions**

981

982 N.K., R.D.V., and M.A.M. designed research; N.K. performed research; N.K., R.D.,

983 S.M.D. and M.A.M. contributed new resources; N.K. analyzed data; and N.K., R.D.V.,

984 S.M.D., and M.A.M wrote the paper.



## 985 **References**

986

- 987 Arnold, M., Cavalcanti-Adam, E. A., Glass, R., Blümmel, J., Eck, W., Kantlehner, M., ...  
988 Spatz, J. P. (2004). Activation of integrin function by nanopatterned adhesive  
989 interfaces. *ChemPhysChem*, 5(3), 383–388.  
990 <https://doi.org/10.1002/cphc.200301014>
- 991 Bag, N., Wagenknecht-Wiesner, A., Lee, A., Shi, S., & Holowka, D. A. (2020). Lipid-  
992 based, protein-based, and steric interactions synergize to facilitate transmembrane  
993 signaling stimulated by antigen-clustering of IgE receptors. *BioRxiv*.  
994 <https://doi.org/2020.12.26.424347>
- 995 Bakalar, M. H., Joffe, A. M., Schmid, E. M., Son, S., Podolski, M., & Fletcher, D. A.  
996 (2018). Size-Dependent Segregation Controls Macrophage Phagocytosis of  
997 Antibody-Opsonized Targets. *Cell*. <https://doi.org/10.1016/j.cell.2018.05.059>
- 998 Beekman, J. M., van der Linden, J. A., van de Winkel, J. G. J., & Leusen, J. H. W.  
999 (2008). FcγRI (CD64) resides constitutively in lipid rafts. *Immunology Letters*,  
1000 116(2), 149–155. <https://doi.org/10.1016/j.imlet.2007.12.003>
- 1001 Ben M'Barek, K., Molino, D., Quignard, S., Plamont, M. A., Chen, Y., Chavrier, P., &  
1002 Fattaccioli, J. (2015). Phagocytosis of immunoglobulin-coated emulsion droplets.  
1003 *Biomaterials*, 51, 270–277. <https://doi.org/10.1016/j.biomaterials.2015.02.030>
- 1004 Berger, R. M. L., Weck, J. M., Kempe, S. M., Liedl, T., Rädler, J. O., Monzel, C., &  
1005 Heuer-Jungemann, A. (2020). Nanoscale Organization of FasL on DNA Origami as  
1006 a Versatile Platform to Tune Apoptosis Signaling in Cells. *BioRxiv*,  
1007 2020.07.05.187203. <https://doi.org/10.1101/2020.07.05.187203>
- 1008 Burroughs, N. J., Köhler, K., Miloserdov, V., Dustin, M. L., van der Merwe, P. A., &  
1009 Davis, D. M. (2011). Boltzmann energy-based image analysis demonstrates that  
1010 extracellular domain size differences explain protein segregation at immune  
1011 synapses. *PLoS Computational Biology*, 7(8).  
1012 <https://doi.org/10.1371/journal.pcbi.1002076>
- 1013 Cai, H., Muller, J., Depoil, D., Mayya, V., Sheetz, M. P., Dustin, M. L., & Wind, S. J.  
1014 (2018). Full control of ligand positioning reveals spatial thresholds for T cell  
1015 receptor triggering. *Nature Nanotechnology*, 13(7), 610–617.  
1016 <https://doi.org/10.1038/s41565-018-0113-3>
- 1017 Carbone, C. B., Kern, N., Fernandes, R. A., Hui, E., Su, X., Garcia, K. C., & Vale, R. D.  
1018 (2017). In vitro reconstitution of T cell receptor-mediated segregation of the CD45  
1019 phosphatase. *Proceedings of the National Academy of Sciences of the United*  
1020 *States of America*, 114(44), E9338–E9345.  
1021 <https://doi.org/10.1073/pnas.1710358114>
- 1022 Chao, M. P., Alizadeh, A. A., Tang, C., Myklebust, J. H., Varghese, B., Gill, S., ...  
1023 Majeti, R. (2010). Anti-CD47 Antibody Synergizes with Rituximab to Promote  
1024 Phagocytosis and Eradicate Non-Hodgkin Lymphoma. *Cell*, 142(5), 699–713.  
1025 <https://doi.org/10.1016/j.cell.2010.07.044>
- 1026 Chew, H. Y., De Lima, P. O., Gonzalez Cruz, J. L., Banushi, B., Echejoh, G., Hu, L., ...  
1027 Simpson, F. (2020). Endocytosis Inhibition in Humans to Improve Responses to  
1028 ADCC-Mediating Antibodies. *Cell*, 180(5), 895-914.e27.  
1029 <https://doi.org/10.1016/j.cell.2020.02.019>

- 1030 Chung, M., Koo, B. J., & Boxer, S. G. (2013). Formation and analysis of topographical  
1031 domains between lipid membranes tethered by DNA hybrids of different lengths.  
1032 *Faraday Discussions*, 161, 333–345; discussion 419-59.  
1033 <https://doi.org/10.1039/c2fd20108a>
- 1034 Davis, S. J., & van der Merwe, P. A. (2006). The kinetic-segregation model: TCR  
1035 triggering and beyond. *Nature Immunology*, 7(8), 803–809.  
1036 <https://doi.org/10.1038/ni1369>
- 1037 Deeg, J., Axmann, M., Matic, J., Liapis, A., Depoil, D., Afrose, J., ... Spatz, J. P. (2013).  
1038 *T Cell Activation is Determined by the Number of Presented Antigens*.  
1039 <https://doi.org/10.1021/nl403266t>
- 1040 Delcassian, D., Depoil, D., Rudnicka, D., Liu, M., Davis, D. M., Dustin, M. L., & Dunlop,  
1041 I. E. (2013). Nanoscale ligand spacing influences receptor triggering in T cells and  
1042 NK cells. *Nano Letters*, 13(11), 5608–5614. <https://doi.org/10.1021/nl403252x>
- 1043 Dilillo, D. J., Tan, G. S., Palese, P., & Ravetch, J. V. (2014). Broadly neutralizing  
1044 hemagglutinin stalk-specific antibodies require FcR interactions for protection  
1045 against influenza virus in vivo. *Nature Medicine*, 20(2), 143–151.  
1046 <https://doi.org/10.1038/nm.3443>
- 1047 Dinic, J., Riehl, A., Adler, J., & Parmryd, I. (2015). The T cell receptor resides in ordered  
1048 plasma membrane nanodomains that aggregate upon patching of the receptor.  
1049 *Scientific Reports*, 5(May), 1–9. <https://doi.org/10.1038/srep10082>
- 1050 Divine, R., Dang, H. V., Ueda, G., Fallas, J. A., Vulovic, I., Sheffler, W., ... Baker, D.  
1051 (2020). Designed proteins assemble antibodies into modular nanocages. *BioRxiv*.  
1052 <https://doi.org/10.1101/2020.12.01.406611>
- 1053 Dong, R., Aksel, T., Chan, W., Germain, R. N., Vale, R. D., & Douglas, S. M. (2021).  
1054 DNA origami patterning of synthetic T cell receptors reveals spatial control of th  
1055 sensitivity and kinetics of signal activation. *BioRxiv*.
- 1056 Duchemin, A. M., Ernst, L. K., & Anderson, C. L. (1994). Clustering of the high affinity  
1057 Fc receptor for immunoglobulin G (FcγRI) results in phosphorylation of its  
1058 associated γ-chain. *Journal of Biological Chemistry*, 269(16), 12111–12117.
- 1059 Eggeling, C., Ringemann, C., Medda, R., Schwarzmann, G., Sandhoff, K., Polyakova,  
1060 S., ... Hell, S. W. (2009). Direct observation of the nanoscale dynamics of  
1061 membrane lipids in a living cell. *Nature*, 457(7233), 1159–1162.  
1062 <https://doi.org/10.1038/nature07596>
- 1063 Erwig, L. P., & Gow, N. A. R. (2016, February 15). Interactions of fungal pathogens with  
1064 phagocytes. *Nature Reviews Microbiology*, Vol. 14, pp. 163–176.  
1065 <https://doi.org/10.1038/nrmicro.2015.21>
- 1066 Fallas, J. A., Ueda, G., Sheffler, W., Nguyen, V., McNamara, D. E., Sankaran, B., ...  
1067 Baker, D. (2017). Computational design of self-assembling cyclic protein homo-  
1068 oligomers. *Nature Chemistry*, 9(4), 353–360. <https://doi.org/10.1038/nchem.2673>
- 1069 Freeman, S. A., Goyette, J., Furuya, W., Anton Van Der Merwe, P., Das, R.,  
1070 Correspondence, S. G., ... Grinstein, S. (2016). Integrins Form an Expanding  
1071 Diffusional Barrier that Coordinates Phagocytosis. *Cell*, 164, 128–140.  
1072 <https://doi.org/10.1016/j.cell.2015.11.048>
- 1073 Gonzalez-Quintela, A., Alende, R., Gude, F., Campos, J., Rey, J., Meijide, L. M., ...  
1074 Vidal, C. (2008). Serum levels of immunoglobulins (IgG, IgA, IgM) in a general adult  
1075 population and their relationship with alcohol consumption, smoking and common

- 1076 metabolic abnormalities. *Clinical and Experimental Immunology*, 151(1), 42–50.  
1077 <https://doi.org/10.1111/j.1365-2249.2007.03545.x>
- 1078 Goodridge, H. S., Underhill, D. M., & Touret, N. (2012). Mechanisms of Fc Receptor and  
1079 Dectin-1 Activation for Phagocytosis. *Traffic*, 13(8), 1062–1071.  
1080 <https://doi.org/10.1111/j.1600-0854.2012.01382.x>
- 1081 Griffin, F. M., Griffin, J. A., Leider, J. E., & Silverstein, S. C. (1975). Studies on the  
1082 mechanism of phagocytosis. I. Requirements for circumferential attachment of  
1083 particle-bound ligands to specific receptors on the macrophage plasma membrane.  
1084 *Journal of Experimental Medicine*, 142(5), 1263–1282.  
1085 <https://doi.org/10.1084/jem.142.5.1263>
- 1086 Holowka, D., & Baird, B. (1996). Antigen-Mediated IGE Receptor Aggregation and  
1087 Signaling: A Window on Cell Surface Structure and Dynamics. *Annual Review of*  
1088 *Biophysics and Biomolecular Structure*, 25(1), 79–112.  
1089 <https://doi.org/10.1146/annurev.bb.25.060196.000455>
- 1090 Hong, F., Zhang, F., Liu, Y., & Yan, H. (2017). DNA Origami: Scaffolds for Creating  
1091 Higher Order Structures. In *Chemical Reviews* (Vol. 117).  
1092 <https://doi.org/10.1021/acs.chemrev.6b00825>
- 1093 Huang, M. M., Indik, Z., Brass, L. F., Hoxie, J. A., Schreiber, A. D., & Brugge, J. S.  
1094 (1992). Activation of FcγRII induces tyrosine phosphorylation of multiple proteins  
1095 including FcγRII. *Journal of Biological Chemistry*, 267(8), 5467–5473.
- 1096 Huang, X., Williams, J. Z., Chang, R., Li, Z., Burnett, C. E., Hernandez-Lopez, R., ...  
1097 Desai, T. A. (2020). DNA scaffolds enable efficient and tunable functionalization of  
1098 biomaterials for immune cell modulation. *Nature Nanotechnology*.  
1099 <https://doi.org/10.1038/s41565-020-00813-z>
- 1100 Jaumouillé, V., Farkash, Y., Jaqaman, K., Das, R., Lowell, C. A., & Grinstein, S. (2014).  
1101 Actin cytoskeleton reorganization by syk regulates fcγ receptor responsiveness by  
1102 increasing its lateral mobility and clustering. *Developmental Cell*, 29(5), 534–546.  
1103 <https://doi.org/10.1016/j.devcel.2014.04.031>
- 1104 Kabouridis, P. S. (2006, January 9). Lipid rafts in T cell receptor signalling (review).  
1105 *Molecular Membrane Biology*, Vol. 23, pp. 49–57.  
1106 <https://doi.org/10.1080/09687860500453673>
- 1107 Kato, Y., Abbott, R. K., Freeman, B. L., Irvine, D. J., Schief, W. R., Crotty, S., ... Menis,  
1108 S. (2020). *Multifaceted Effects of Antigen Valency on B Cell Response Composition*  
1109 *and Differentiation In Vivo*. <https://doi.org/10.1016/j.immuni.2020.08.001>
- 1110 Katsumata, O., Hara-Yokoyama, M., Sautès-Fridman, C., Nagatsuka, Y., Katada, T.,  
1111 Hirabayashi, Y., ... Furuyama, S. (2001). Association of FcγRII with Low-Density  
1112 Detergent-Resistant Membranes Is Important for Cross-Linking-Dependent  
1113 Initiation of the Tyrosine Phosphorylation Pathway and Superoxide Generation. *The*  
1114 *Journal of Immunology*, 167(10), 5814–5823.  
1115 <https://doi.org/10.4049/jimmunol.167.10.5814>
- 1116 Krobath, H., Rózycki, B., Lipowsky, R., & Weikl, T. R. (2009). Binding cooperativity of  
1117 membrane adhesion receptors. *Soft Matter*, 5(17), 3354–3361.  
1118 <https://doi.org/10.1039/b902036e>
- 1119 Krobath, H., Rózycki, B., Lipowsky, R., & Weikl, T. R. (2011). Line tension and stability  
1120 of domains in cell-adhesion zones mediated by long and short receptor-ligand  
1121 complexes. *PLoS ONE*, 6(8). <https://doi.org/10.1371/journal.pone.0023284>

- 1122 Kwiatkowska, K., & Sobota, A. (2001). The clustered Fc $\gamma$  receptor II is recruited to Lyn-  
1123 containing membrane domains and undergoes phosphorylation in a cholesterol-  
1124 dependent manner. *European Journal of Immunology*, 31(4), 989–998.  
1125 [https://doi.org/10.1002/1521-4141\(200104\)31:4<989::AID-IMMU989>3.0.CO;2-V](https://doi.org/10.1002/1521-4141(200104)31:4<989::AID-IMMU989>3.0.CO;2-V)
- 1126 Li, P., Jiang, N., Nagarajan, S., Wohlhueter, R., Selvaraj, P., & Zhu, C. (2007). Affinity  
1127 and kinetic analysis of Fc $\gamma$  receptor IIIa (CD16a) binding to IgG ligands. *Journal of*  
1128 *Biological Chemistry*, 282(9), 6210–6221. <https://doi.org/10.1074/jbc.M609064200>
- 1129 Lin, J., Kurilova, S., Scott, B. L., Bosworth, E., Iverson, B. E., Bailey, E. M., & Hoppe, A.  
1130 D. (2016). TIRF imaging of Fc gamma receptor microclusters dynamics and  
1131 signaling on macrophages during frustrated phagocytosis. *BMC Immunology*, 17, 5.  
1132 <https://doi.org/10.1186/s12865-016-0143-2>
- 1133 Lopes, F. B., Bálint, Š., Valvo, S., Felce, J. H., Hessel, E. M., Dustin, M. L., & Davis, D.  
1134 M. (2017). Membrane nanoclusters of Fc $\gamma$ RI segregate from inhibitory SIRP $\alpha$  upon  
1135 activation of human macrophages. *The Journal of Cell Biology*, jcb.201608094.  
1136 <https://doi.org/10.1083/jcb.201608094>
- 1137 Lu, J., Ellsworth, J. L., Hamacher, N., Oak, S. W., & Sun, P. D. (2011). Crystal structure  
1138 of Fc $\gamma$  receptor I and its implication in high affinity  $\gamma$ -immunoglobulin binding.  
1139 *Journal of Biological Chemistry*, 286(47), 40608–40613.  
1140 <https://doi.org/10.1074/jbc.M111.257550>
- 1141 Ma, Y., Lim, Y., Benda, A., Goyette, J., & Gaus, K. (2020). *Clustering of CD3 $\zeta$  is*  
1142 *sufficient to initiate T cell receptor signaling*.  
1143 <https://doi.org/10.1101/2020.02.17.953463>
- 1144 McCall, M. N., Shotton, D. M., & Barclay, A. N. (1992). Expression of soluble isoforms of  
1145 rat CD45. Analysis by electron microscopy and use in epitope mapping of anti-  
1146 CD45R monoclonal antibodies. *Immunology*, 76(2), 310–317. Retrieved from  
1147 <http://www.ncbi.nlm.nih.gov/pubmed/1378817>
- 1148 Morrissey, M. A., Kern, N., & Vale, R. D. (2020). CD47 Ligation Repositions the  
1149 Inhibitory Receptor SIRPA to Suppress Integrin Activation and Phagocytosis.  
1150 *Immunity*, 53(2), 290-302.e6. <https://doi.org/10.1016/j.immuni.2020.07.008>
- 1151 Morrissey, M. A., Williamson, A. P., Steinbach, A. M., Roberts, E. W., Kern, N.,  
1152 Headley, M. B., & Vale, R. D. (2018). Chimeric antigen receptors that trigger  
1153 phagocytosis. *ELife*. <https://doi.org/10.7554/eLife.36688>
- 1154 Nimmerjahn, F., & Ravetch, J. V. (2005). Translating basic mechanisms of IgG effector  
1155 activity into next generation cancer therapies. *IECON Proceedings (Industrial*  
1156 *Electronics Conference)*, 2005(May), 1104–1109.  
1157 <https://doi.org/10.1109/IECON.2005.1569059>
- 1158 Nimmerjahn, F., & Ravetch, J. V. (2008). Fc $\gamma$  receptors as regulators of immune  
1159 responses. *Nature Reviews Immunology*. <https://doi.org/10.1038/nri2206>
- 1160 Rosano, C., Arosio, P., & Bolognesi, M. (1999). The X-ray three-dimensional structure  
1161 of avidin. *Biomolecular Engineering*, 16(1–4), 5–12. [https://doi.org/10.1016/S1050-3862\(99\)00047-9](https://doi.org/10.1016/S1050-3862(99)00047-9)
- 1162
- 1163 Rothmund, P. W. K. (2006). Folding DNA to create nanoscale shapes and patterns.  
1164 *Nature*, 440(7082), 297–302. <https://doi.org/10.1038/nature04586>
- 1165 Rózycki, B., Lipowsky, R., & Weikl, T. R. (2010). Segregation of receptor-ligand  
1166 complexes in cell adhesion zones: Phase diagrams and the role of thermal  
1167 membrane roughness. *New Journal of Physics*, 12. [40](https://doi.org/10.1088/1367-</a></p></div><div data-bbox=)



- 1168 2630/12/9/095003  
1169 Schmid, E. M., Bakalar, M. H., Choudhuri, K., Weichsel, J., Ann, H. S., Geissler, P. L.,  
1170 ... Fletcher, D. A. (2016). Size-dependent protein segregation at membrane  
1171 interfaces. *Nature Physics*, 12(7), 704–711. <https://doi.org/10.1038/nphys3678>  
1172 Seeman, N. C. (2010). Nanomaterials Based on DNA. *Annual Review of Biochemistry*,  
1173 79(1), 65–87. <https://doi.org/10.1146/annurev-biochem-060308-102244>  
1174 Seifert, O., Plappert, A., Fellermeier, S., Siegemund, M., Pfizenmaier, K., &  
1175 Kontermann, R. E. (2014). Tetravalent Antibody-scTRAIL Fusion Proteins with  
1176 Improved Properties. *Molecular Cancer Therapeutics*, 13(1), 101–111.  
1177 <https://doi.org/10.1158/1535-7163.MCT-13-0396>  
1178 Shaw, A., Hoffecker, I. T., Smyrlaki, I., Rosa, J., Grevys, A., Bratlie, D., ... Högberg, B.  
1179 (2019). Binding to nanopatterned antigens is dominated by the spatial tolerance of  
1180 antibodies. *Nature Nanotechnology*, 14(2), 184–190.  
1181 <https://doi.org/10.1038/s41565-018-0336-3>  
1182 Sil, D., Lee, J. B., Luo, D., Holowka, D., & Baird, B. (2007). Trivalent Ligands with Rigid  
1183 DNA Spacers Reveal Structural Requirements For IgE Receptor Signaling in RBL  
1184 Mast Cells. *ACS Chemical Biology*, 2(10), 674–684.  
1185 <https://doi.org/10.1021/cb7001472>  
1186 Simons, K., & Ikonen, E. (1997). Functional rafts in cell membranes. *Nature*, 387(6633),  
1187 569–572.  
1188 Sobota, A., Strzelecka-Kiliszek, A., Gładkowska, E., Yoshida, K., Mrozińska, K., &  
1189 Kwiatkowska, K. (2005). Binding of IgG-Opsonized Particles to FcγR Is an Active  
1190 Stage of Phagocytosis That Involves Receptor Clustering and Phosphorylation. *The*  
1191 *Journal of Immunology*, 175(7), 4450–4457.  
1192 <https://doi.org/10.4049/jimmunol.175.7.4450>  
1193 Sohn, H. W., Tolar, P., Jin, T., & Pierce, S. K. (2006). Fluorescence resonance energy  
1194 transfer in living cells reveals dynamic membrane changes in the initiation of B cell  
1195 signaling. *Proceedings of the National Academy of Sciences of the United States of*  
1196 *America*, 103(21), 8143–8148. <https://doi.org/10.1073/pnas.0509858103>  
1197 Stone, M. B., Shelby, S. A., Nññez, M. F., Wisser, K., & Veatch, S. L. (2017). Protein  
1198 sorting by lipid phase-like domains supports emergent signaling function in b  
1199 lymphocyte plasma membranes. *ELife*, 6, 1–33. <https://doi.org/10.7554/eLife.19891>  
1200 Stuurman, N., Edelstein, A., Amodaj, N., Hoover, K., & Vale, R. (2010, October).  
1201 Computer control of microscopes using manager. *Current Protocols in Molecular*  
1202 *Biology*, p. Unit14.20. <https://doi.org/10.1002/0471142727.mb1420s92>  
1203 Swanson, J. A., & Baer, S. C. (1995). Phagocytosis by zippers and triggers. *Trends in*  
1204 *Cell Biology*, 5(3), 89–93. [https://doi.org/10.1016/S0962-8924\(00\)88956-4](https://doi.org/10.1016/S0962-8924(00)88956-4)  
1205 Taylor, M. J., Husain, K., Gartner, Z. J., Mayor, S., & Vale, R. D. (2017). A DNA-Based  
1206 T Cell Receptor Reveals a Role for Receptor Clustering in Ligand Discrimination.  
1207 *Cell*, 169(1), 108–119.e20. <https://doi.org/10.1016/j.cell.2017.03.006>  
1208 Uchida, J., Hamaguchi, Y., Oliver, J. A., Ravetch, J. V., Poe, J. C., Haas, K. M., &  
1209 Tedder, T. F. (2004). The innate mononuclear phagocyte network depletes B  
1210 lymphocytes through Fc receptor-dependent mechanisms during anti-CD20  
1211 antibody immunotherapy. *Journal of Experimental Medicine*, 199(12), 1659–1669.  
1212 <https://doi.org/10.1084/jem.20040119>  
1213 Ueda, G., Antanasijevic, A., Fallas, J. A., Sheffler, W., Copps, J., Ellis, D., ... Baker, D.

- 1214 (2020). Tailored design of protein nanoparticle scaffolds for multivalent presentation  
1215 of viral glycoprotein antigens. *ELife*, 9, 1–30. <https://doi.org/10.7554/ELIFE.57659>  
1216 Veneziano, R., Moyer, T. J., Stone, M. B., Shepherd, T. R., Schief, W. R., Irvine, D. J.,  
1217 & Bathe, M. (2020). Role of nanoscale antigen organization on B-cell activation  
1218 probed using DNA origami. *BioRxiv*, 2020.02.16.951475.  
1219 <https://doi.org/10.1101/2020.02.16.951475>  
1220 Watanabe, M., Wallace, P. K., Keler, T., Deo, Y. M., Akewanlop, C., & Hayes, D. F.  
1221 (1999). Antibody dependent cellular phagocytosis (ADCP) and antibody dependent  
1222 cellular cytotoxicity (ADCC) of breast cancer cells mediated by bispecific antibody,  
1223 MDX-210. *Breast Cancer Research and Treatment*, 53(3), 199–207.  
1224 <https://doi.org/10.1023/A:1006145507567>  
1225 Weiskopf, K., Ring, A. M., Ho, C. C. M., Volkmer, J. P., Levin, A. M., Volkmer, A. K., ...  
1226 Garcia, K. C. (2013). Engineered SIRP $\alpha$  variants as immunotherapeutic adjuvants  
1227 to anticancer antibodies. *Science*, 341(6141), 88–91.  
1228 <https://doi.org/10.1126/science.1238856>  
1229 Weiskopf, K., & Weissman, I. L. (2015). Macrophages are critical effectors of antibody  
1230 therapies for cancer. *MAbs*, Vol. 7, pp. 303–310.  
1231 <https://doi.org/10.1080/19420862.2015.1011450>  
1232 Woollett, G. R., Williams, A. F., & Shotton, D. M. (1985). Visualisation by low-angle  
1233 shadowing of the leucocyte-common antigen. A major cell surface glycoprotein of  
1234 lymphocytes. *The EMBO Journal*, 4(11), 2827–2830. [https://doi.org/10.1002/j.1460-](https://doi.org/10.1002/j.1460-2075.1985.tb04010.x)  
1235 [2075.1985.tb04010.x](https://doi.org/10.1002/j.1460-2075.1985.tb04010.x)  
1236 Zhang, X., Olsen, H. S., Chen, S., So, E., Zhou, H., Burch, E., ... Strome, S. E. (2016).  
1237 Anti-CD20 Antibody with Multimerized Fc Domains: A Novel Strategy To Deplete B  
1238 Cells and Augment Treatment of Autoimmune Disease. *The Journal of*  
1239 *Immunology*, 196(3), 1165–1176. <https://doi.org/10.4049/jimmunol.1501755>  
1240 Zhang, Y., Hoppe, A. D., & Swanson, J. A. (2010). Coordination of Fc receptor signaling  
1241 regulates cellular commitment to phagocytosis. *Proceedings of the National*  
1242 *Academy of Sciences of the United States of America*, 107(45), 19332–19337.  
1243 <https://doi.org/10.1073/pnas.1008248107>  
1244 Zhao, K., Deng, H., Chen, H., Ross, K. A., Petříček, V., Günther, G., ... Gegenwart, P.  
1245 (2020). Structure of CD20 in complex with the therapeutic monoclonal antibody  
1246 rituximab. *Science*, 367(6483), 1218–1223.  
1247 <https://doi.org/10.1126/science.aaz9356>  
1248 Zhu, J. W., Brdicka, T., Katsumoto, T. R., Lin, J., & Weiss, A. (2008). Structurally  
1249 Distinct Phosphatases CD45 and CD148 Both Regulate B Cell and Macrophage  
1250 Immunoreceptor Signaling. *Immunity*, 28(2), 183–196.  
1251 <https://doi.org/10.1016/j.immuni.2007.11.024>  
1252

## Figure 1

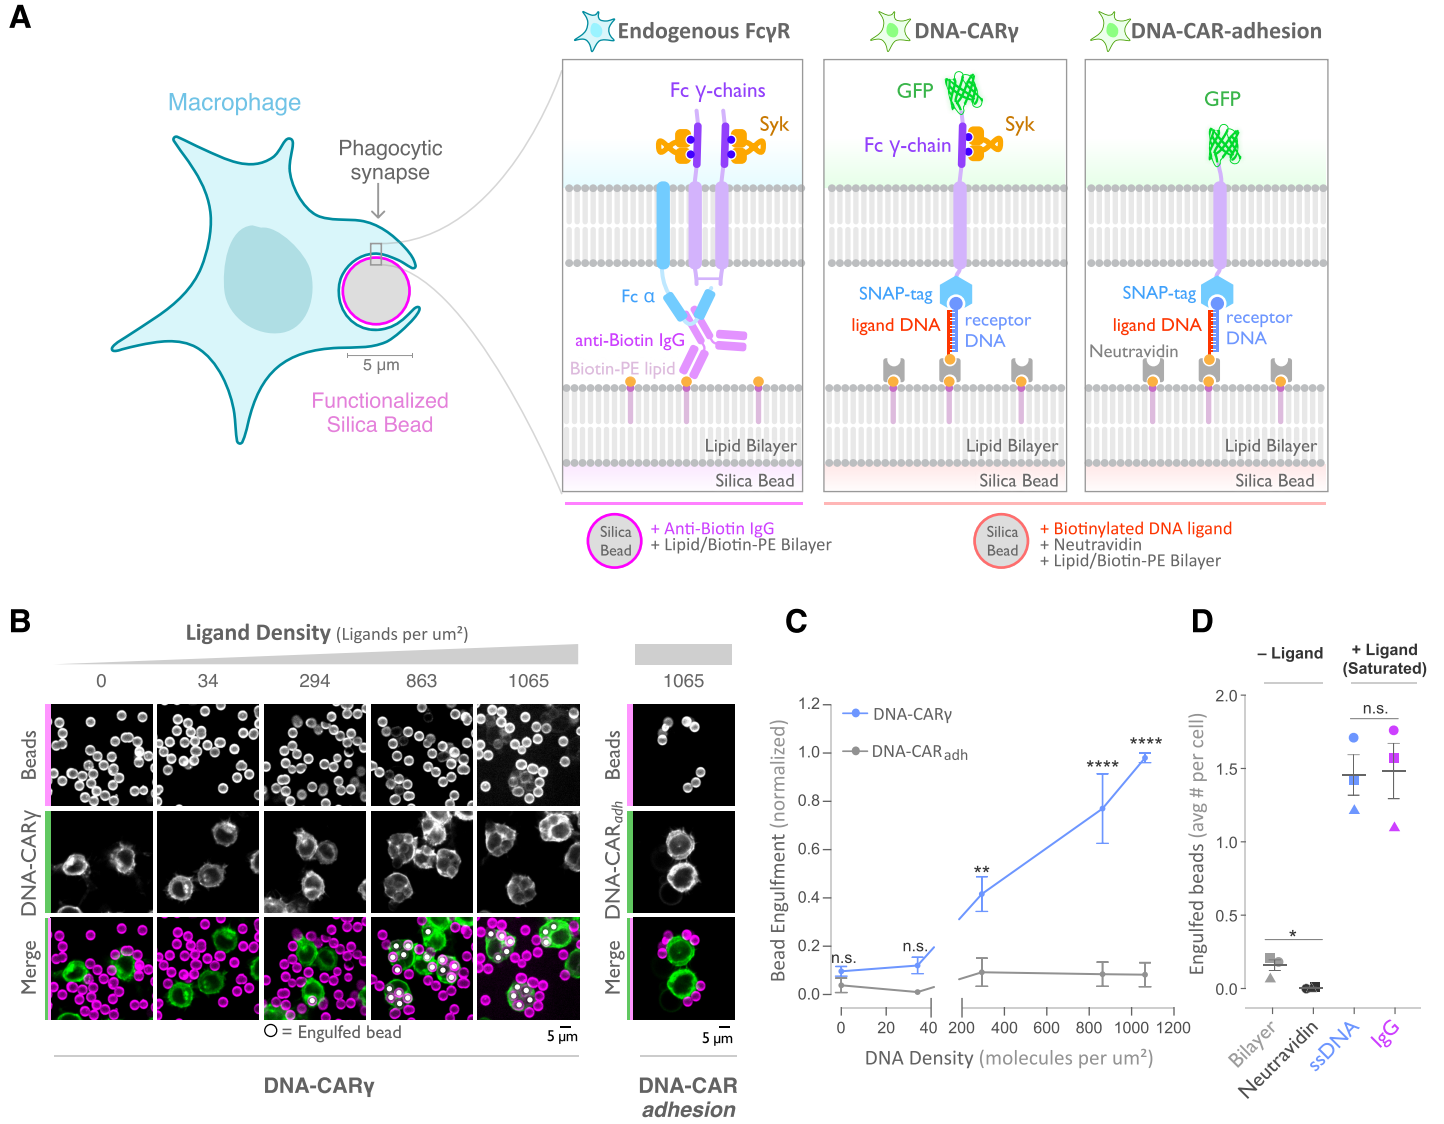



## Figure 2

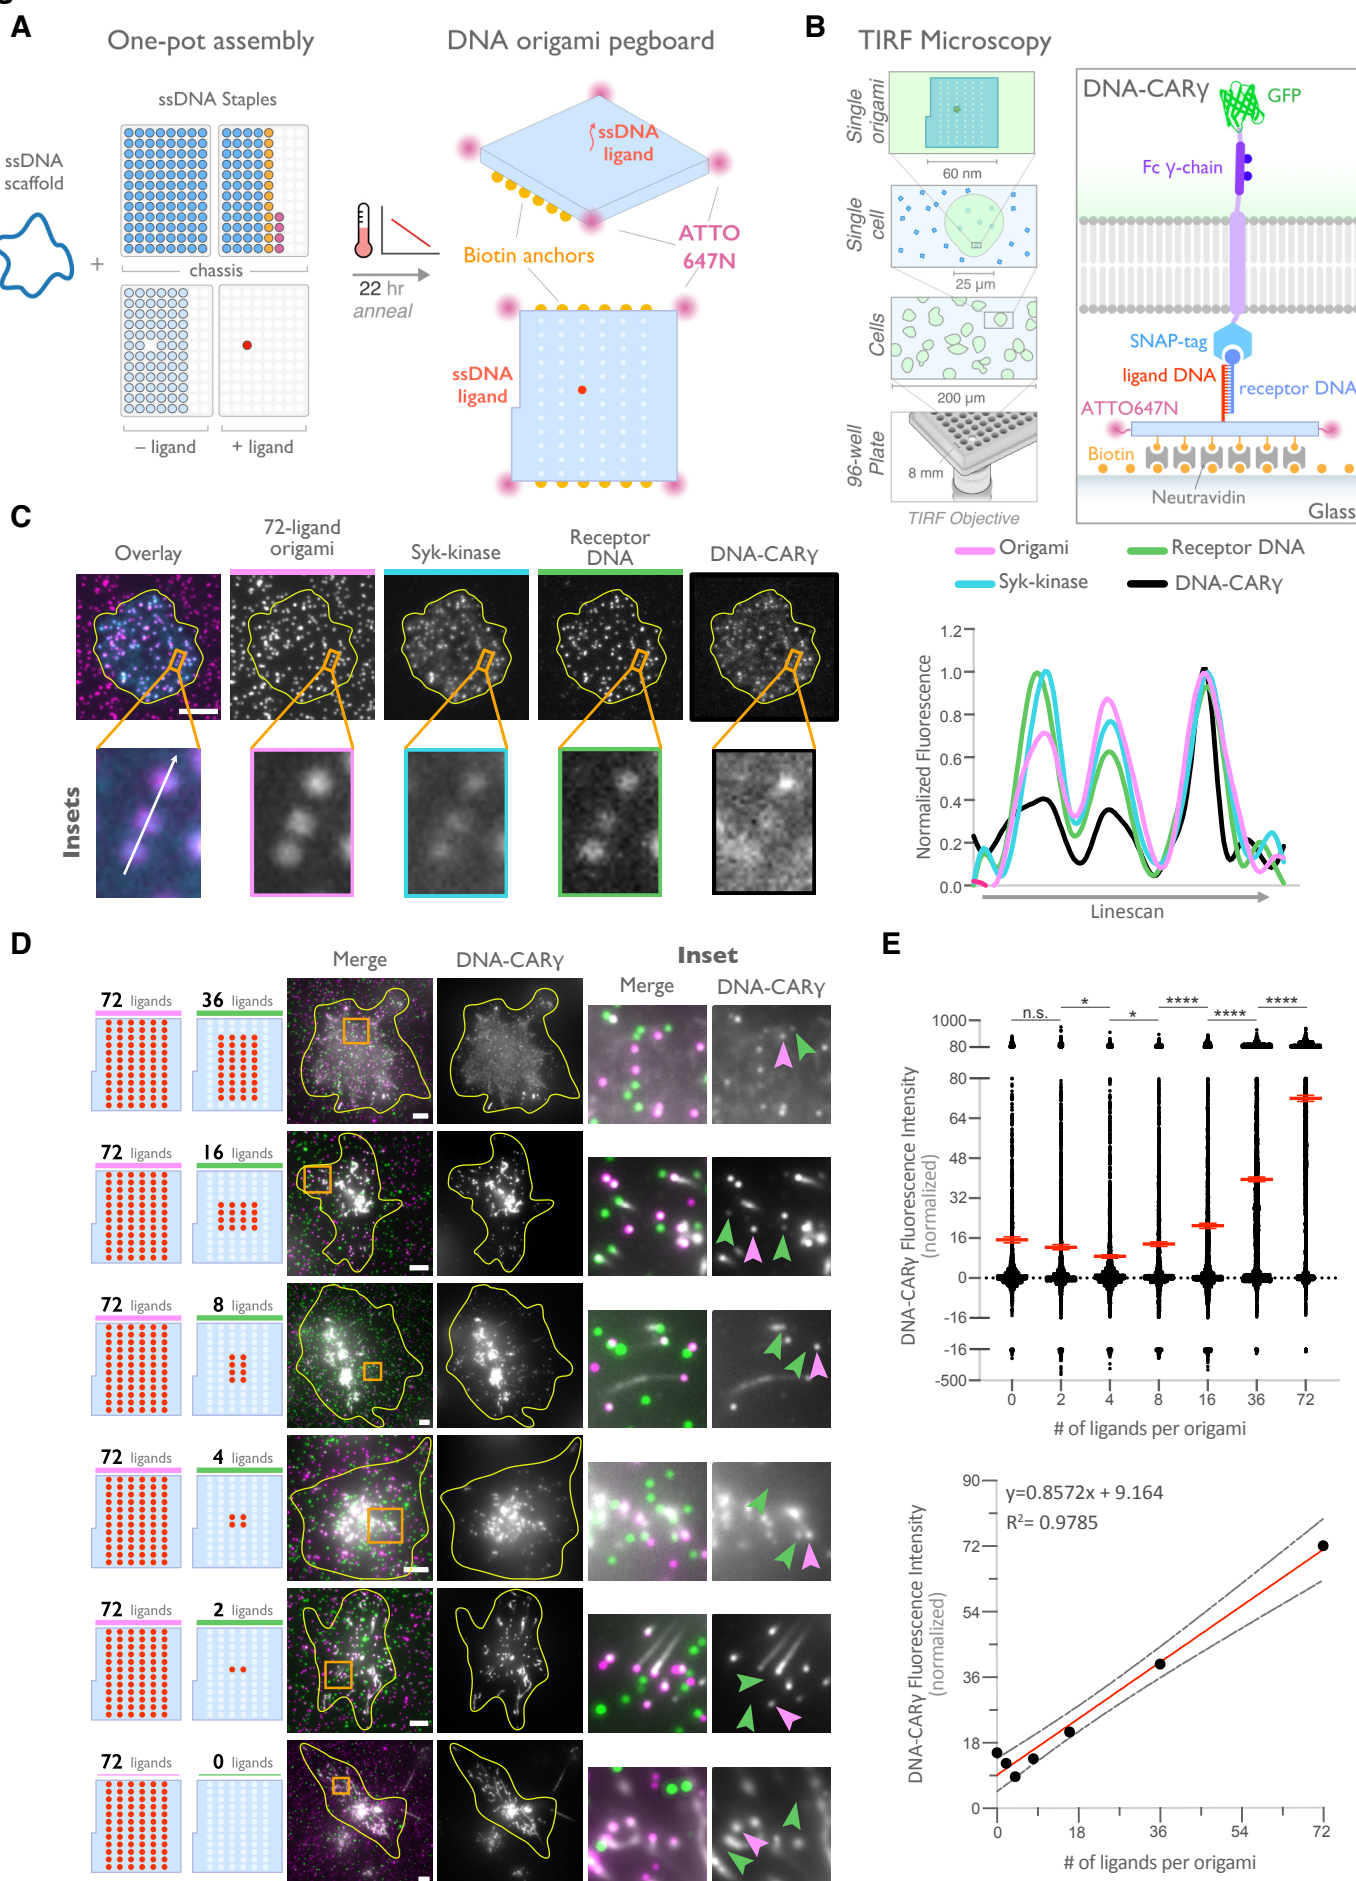

### Figure 3

**A**

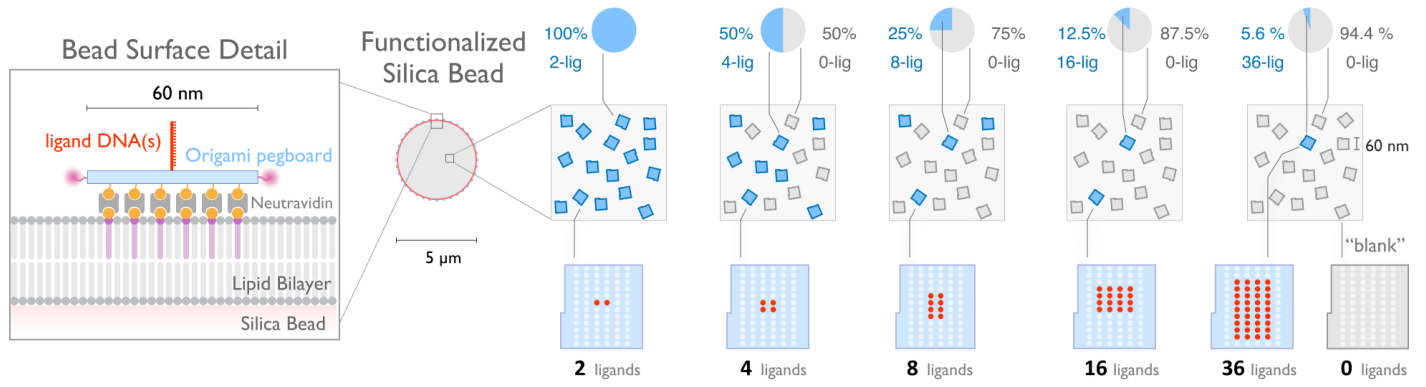

**B**

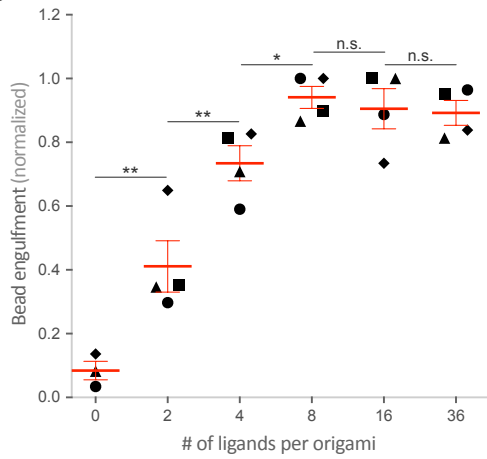

**C**

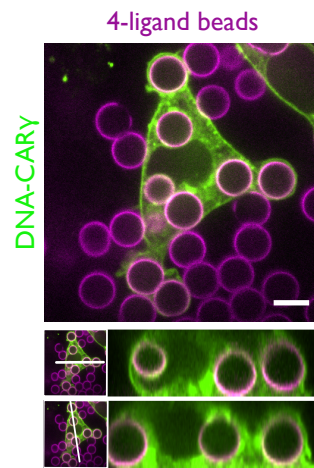

**D**

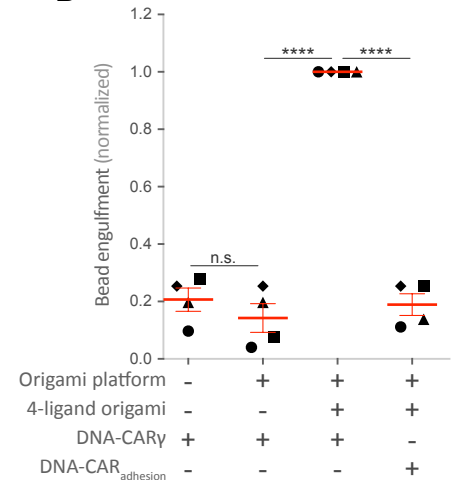



## Figure 5

**A**

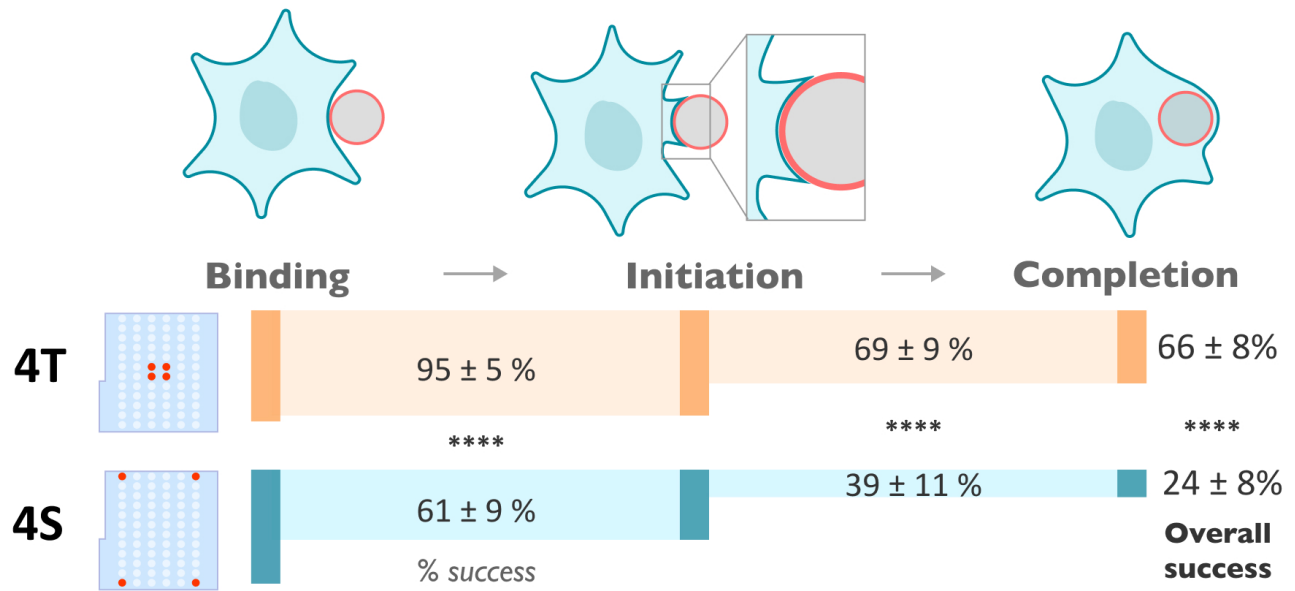

**B**

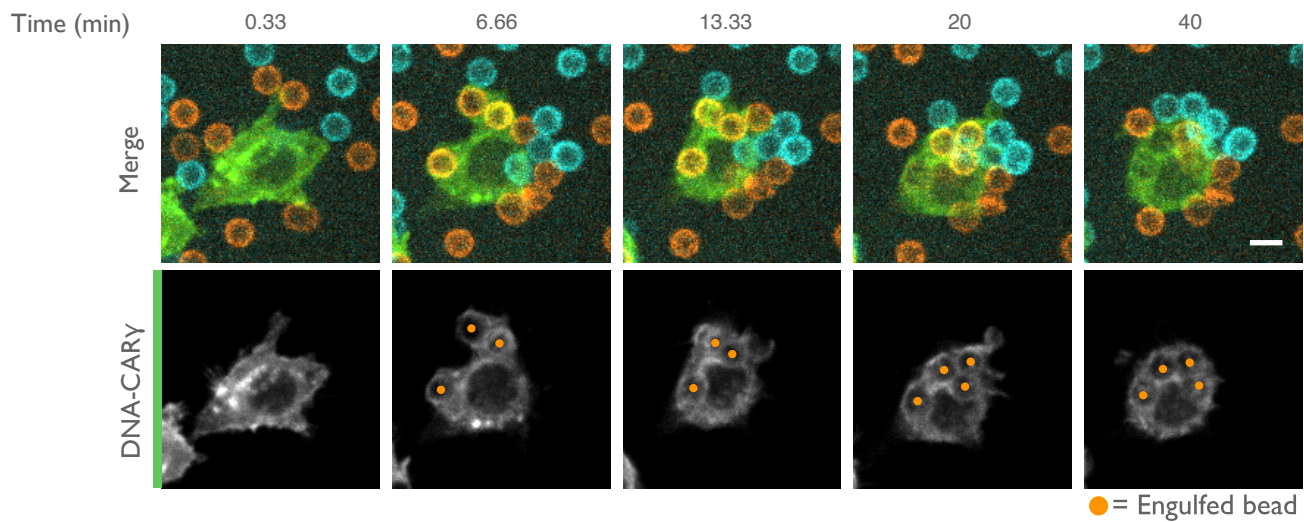

**C**

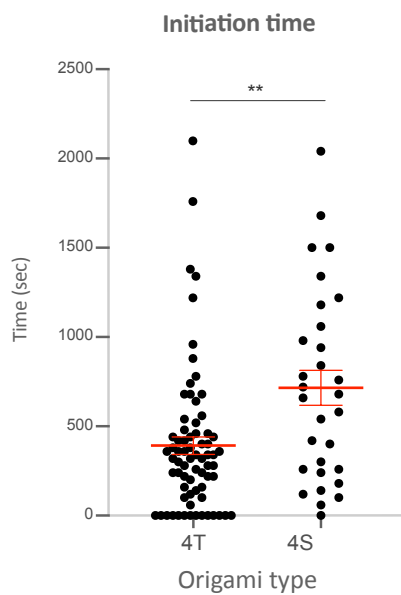

**D**

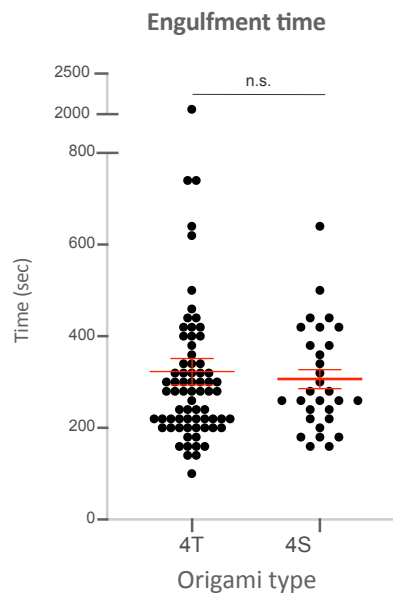

**E**

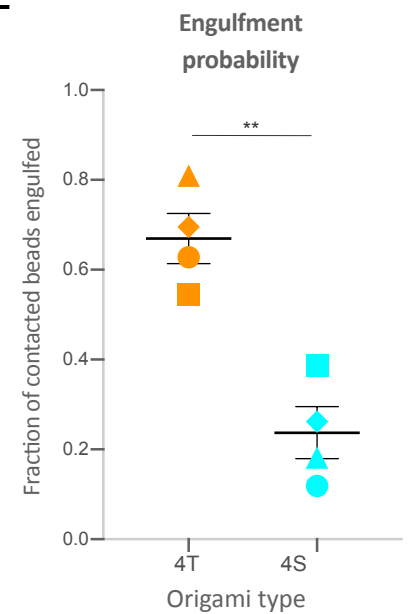



## Figure 6

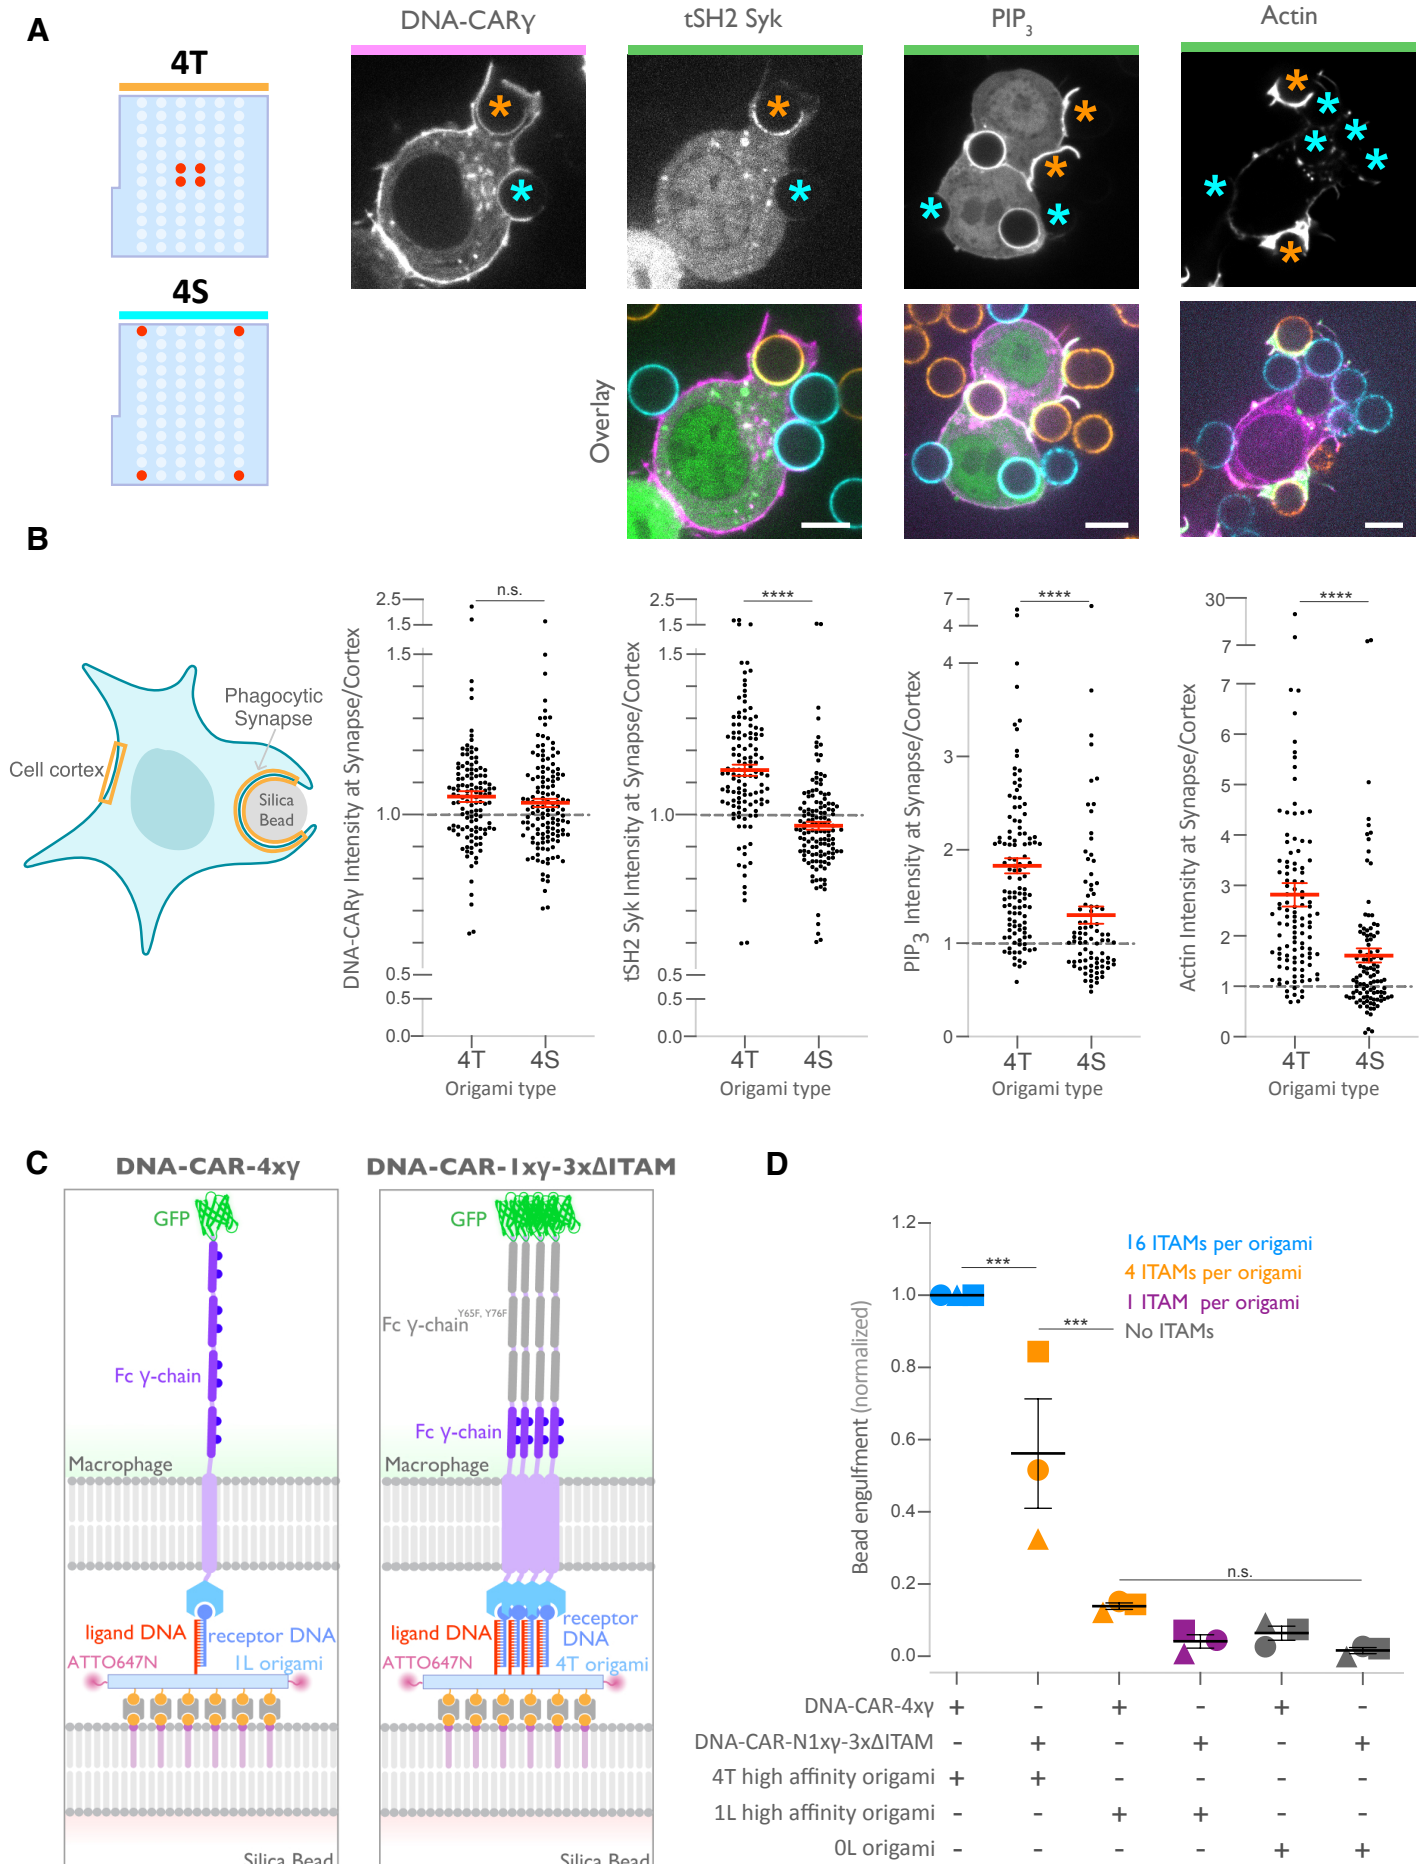

Source: https://www.biorxiv.org/content/10.1101/2021.03.18.436011v1.full.pdf
